# Supplementary material
Source: PubMed Central journal article supplement (PMC3678719)
Supplement: NIHMS474888-supplement-1.pdf [file NIHMS474888-supplement-1.pdf]

*Supplementary Information for*

**Exome and whole genome sequencing of esophageal adenocarcinoma identifies recurrent driver events and mutational complexity**

Austin M. Dulak, Petar Stojanov, Shouyong Peng, Michael S. Lawrence, Cameron Fox, Chip Stewart, Santhoshi Bandla, Yu Imamura, Steven E. Schumacher, Erica Shefler, Aaron McKenna, Kristian Cibulskis, Andrey Sivachenko, Scott L. Carter, Gordon Saksena, Douglas Voet, Alex H. Ramos, Daniel Auclair, Kristin Thompson, Carrie Sougnez, Robert C. Onofrio, Candace Guiducci, Rameen Beroukhim, David Zhou, Lin Lin, Jules Lin, Rishindra Reddy, Andrew Chang, Rodney Landreneau, James D. Luketich, Arjun Pennathur, Shuji Ogino, Todd R. Golub, Stacey B. Gabriel, Eric S. Lander, David G. Beer, Tony E. Godfrey, Gad Getz, and Adam J. Bass\*

\*To whom correspondence should be addressed: [Adam\\_Bass@dfci.harvard.edu](mailto:Adam_Bass@dfci.harvard.edu) (A.J.B)

**Contents of this PDF file**

Supplementary Note: Description of esophageal adenocarcinoma cohorts..... 3

Supplementary Figure 1: Venn diagram representing EAC samples (n=150) and analysis platforms ..... 4

Supplementary Figure 2: Number of AA to C transversions is proportional to overall number of mutations ..... 5

Supplementary Figure 3: Fraction of AA transversions is greater in regions above the GEJ..... 6

Supplementary Figure 4: Overlap of protein coding modifications in known cancer signal transduction pathways..... 7

Supplementary Figure 5: Distribution of coding mutations in chromatin remodeling enzymes..... 8

Supplementary Figure 6: Distribution of protein coding mutations in significantly mutated genes..... 9

Supplementary Table 1: EAC sample cohort for WGS and WES..... 10

Supplementary Table 2: Coverage, mutation, and rearrangement frequencies for individual samples generated by WGS ..... 14

Supplementary Table 3: Mutation rates and transition-transversion ratios in regions of the genome as detected by WGS (n=16)..... 15

|                                                                                                                                       |    |
|---------------------------------------------------------------------------------------------------------------------------------------|----|
| <u>Supplementary Table 5: Predicted in-frame fusion proteins detected by dRanger .....</u>                                            | 16 |
| <u>Supplementary Table 6: Mutation percentage detected by WGS .....</u>                                                               | 17 |
| <u>Supplementary Table 8: Mutation percentage detected by WGS in exons.....</u>                                                       | 18 |
| <u>Supplementary Table 10: Mutation rates of AA&gt;C only and all other mutations binned by expression.....</u>                       | 19 |
| <u>Supplementary Table 11: Mutation strand bias comparing AA&gt;C and all other mutations .....</u>                                   | 20 |
| <u>Supplementary Table 12: Coverage and mutation data for individual samples generated by WES.....</u>                                | 21 |
| <u>Supplementary Table 13: Comparison of coding-region mutations detected by both WGS and WES.....</u>                                | 23 |
| <u>Supplementary Table 16: Protein-coding mutations in EAC identified previously in the COSMIC Database.....</u>                      | 24 |
| <u>Supplementary Table 17: Statistically significant protein-coding mutations in EAC generated by WES using COSMIC territory.....</u> | 28 |
| <u>Supplementary Table 18: Significantly enriched gene ontology (GO) processes across mutated genes identified by WES.....</u>        | 29 |

## **Supplementary Note**

### Description of esophageal adenocarcinoma cohorts

Primary esophageal adenocarcinoma samples (including tumors occurring at the gastro-esophageal junction) were selected for whole exome and whole genome sequencing from three tissue source sites: University of Pittsburgh (Pittsburgh, PA), University of Michigan (Ann Arbor, MI), and the Ontario Tissue Bank (Toronto, Canada). Patients from which specimens were acquired received no prior chemotherapy or radiation treatment prior to the surgical resection of their esophageal cancer. Samples were selected for sequencing analyses on based extraction of sufficient high-quality DNA for sequencing and upon the pathology review of the primary tumor demonstrating high estimated tumor content (estimated greater than 70%).

Tumors from all tissue source sites were collected from patients undergoing therapeutic surgical resection of their clinically localized tumor. All tumors and control samples were immediately frozen with liquid nitrogen.

Hematoxylin and eosin stained slides were examined by a board-certified pathologist to evaluate carcinoma content of all specimens and to verify diagnosis. Patient-matched normal DNA was extracted from histologically-normal surgically resected tissue (either normal squamous esophagus or normal stomach) with no signs of dysplasia or tumor involvement upon pathology review.

All samples were obtained under approval from the institutional review boards of respective institutions and with documented informed consent of the patients. The sequencing and data release of exome sequencing of these samples was reviewed additionally by the local IRB.

Supplemental Figure 1. Venn diagram representing EAC samples (n=150) and analysis platforms

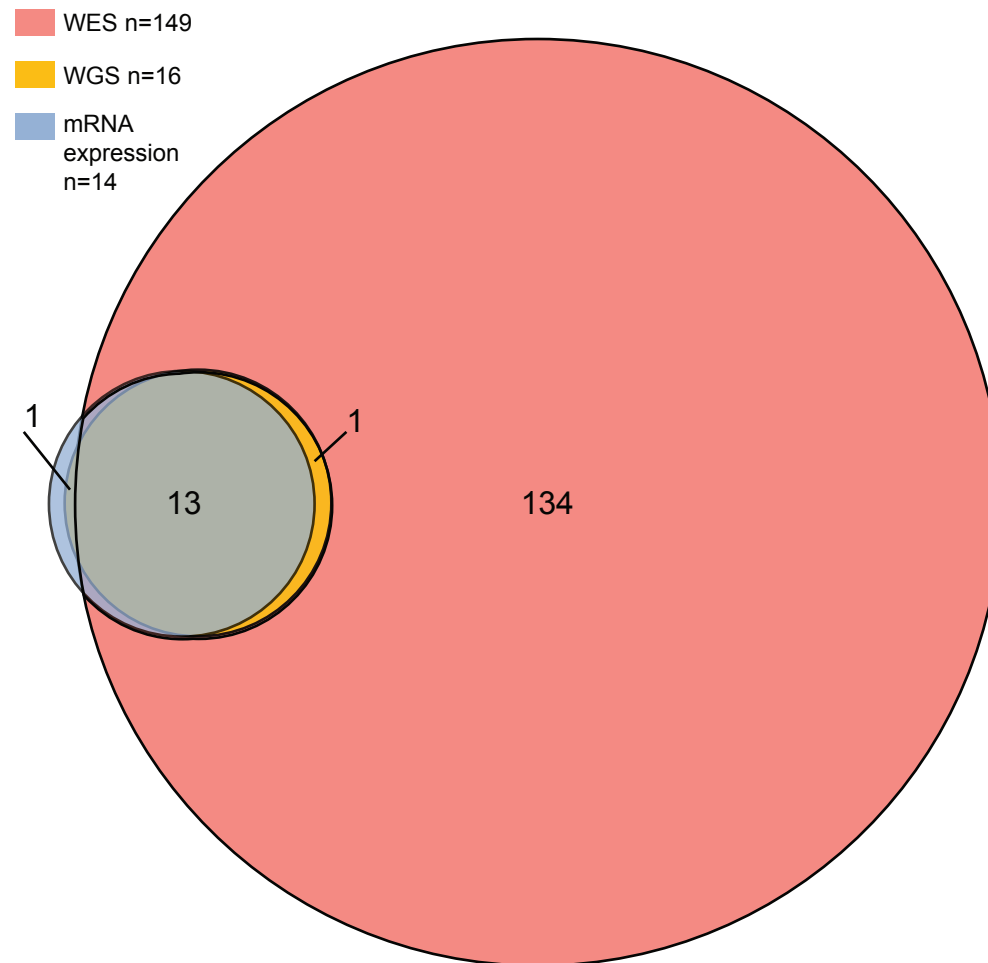

Supplemental Figure 2. Number of AA to C transversions is proportional to overall number of mutations

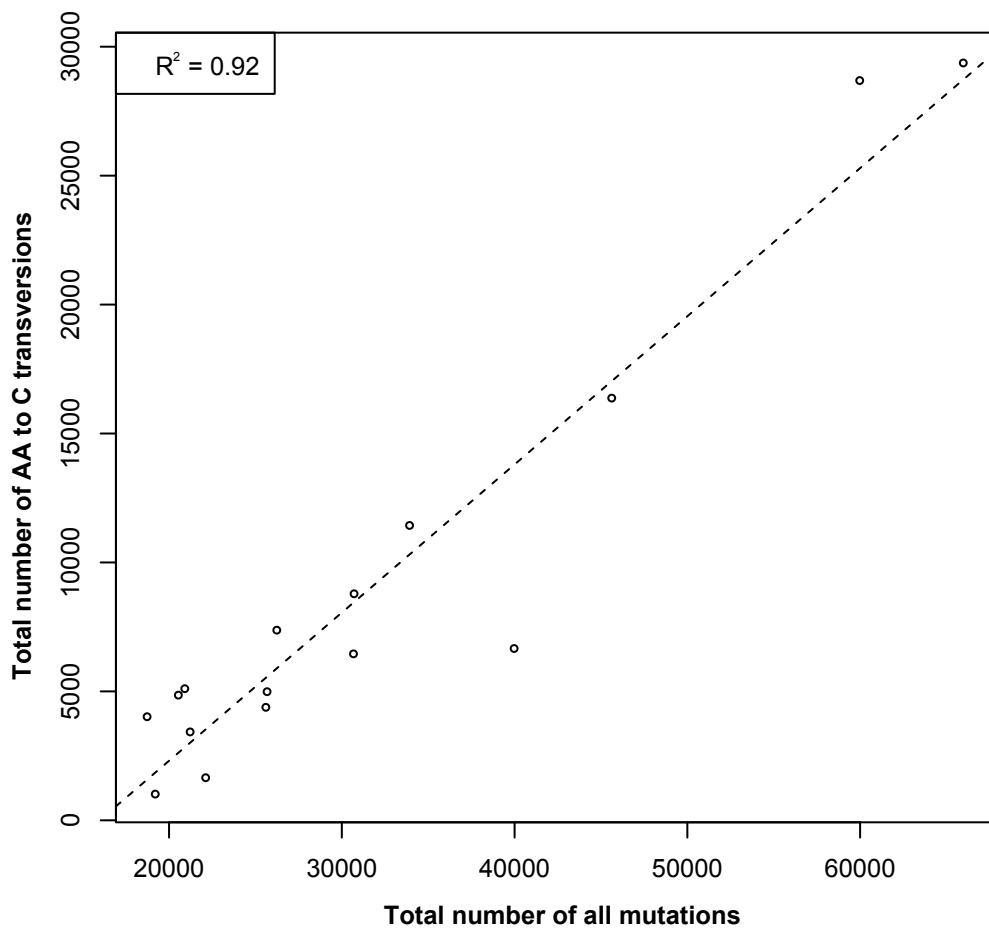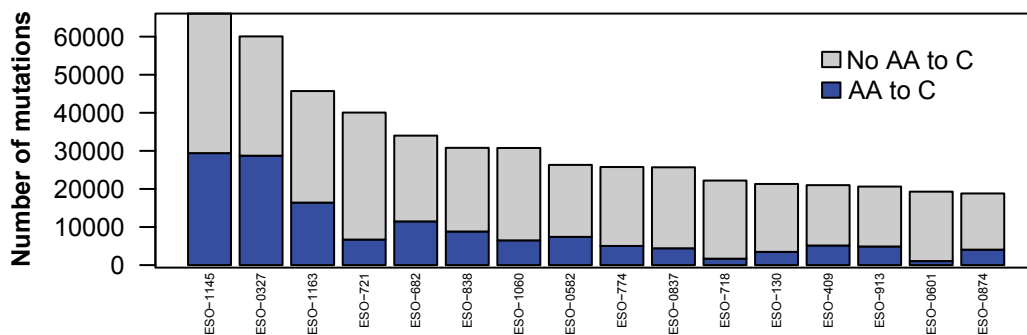

Supplemental Figure 3. Fraction of AA transversions is greater in the regions above the GEJ

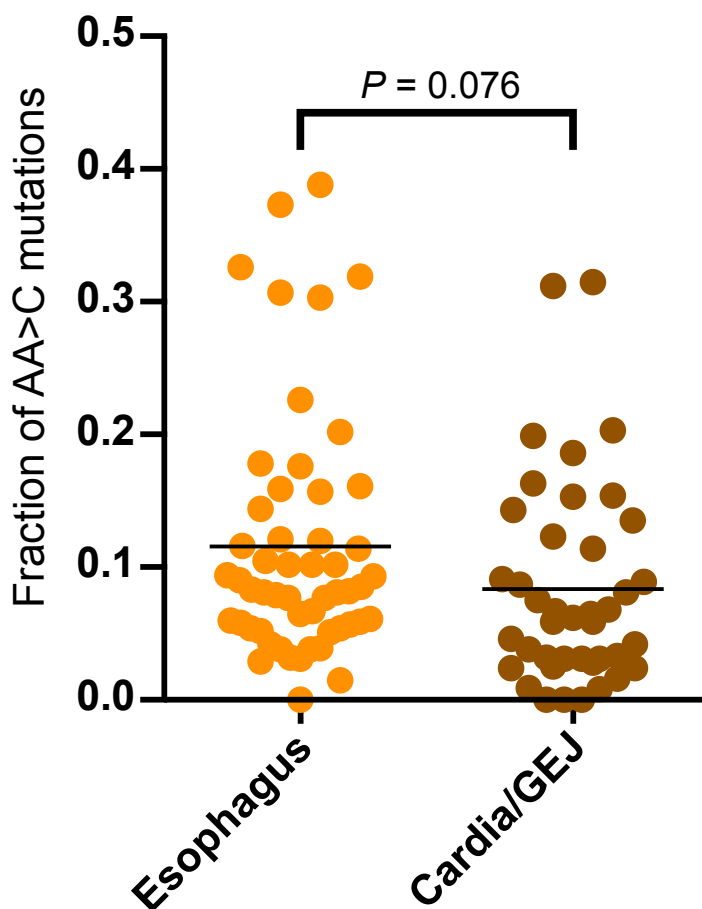

Supplemental Figure 4. EAC samples analyzed by WES were binned by region of the esophagus from which the sample was extracted, where data was available (n=95). The fraction of AA>C mutations in exons was calculated using the number of AA>C mutations over total mutations on a per sample basis. Each dot represents an individual sample. The black bar represents the median value for each bin. P-value was calculated using the Student's t-test, paired.

# Supplemental Figure 4. Overlap of protein coding modifications in known cancer signal transduction pathways.

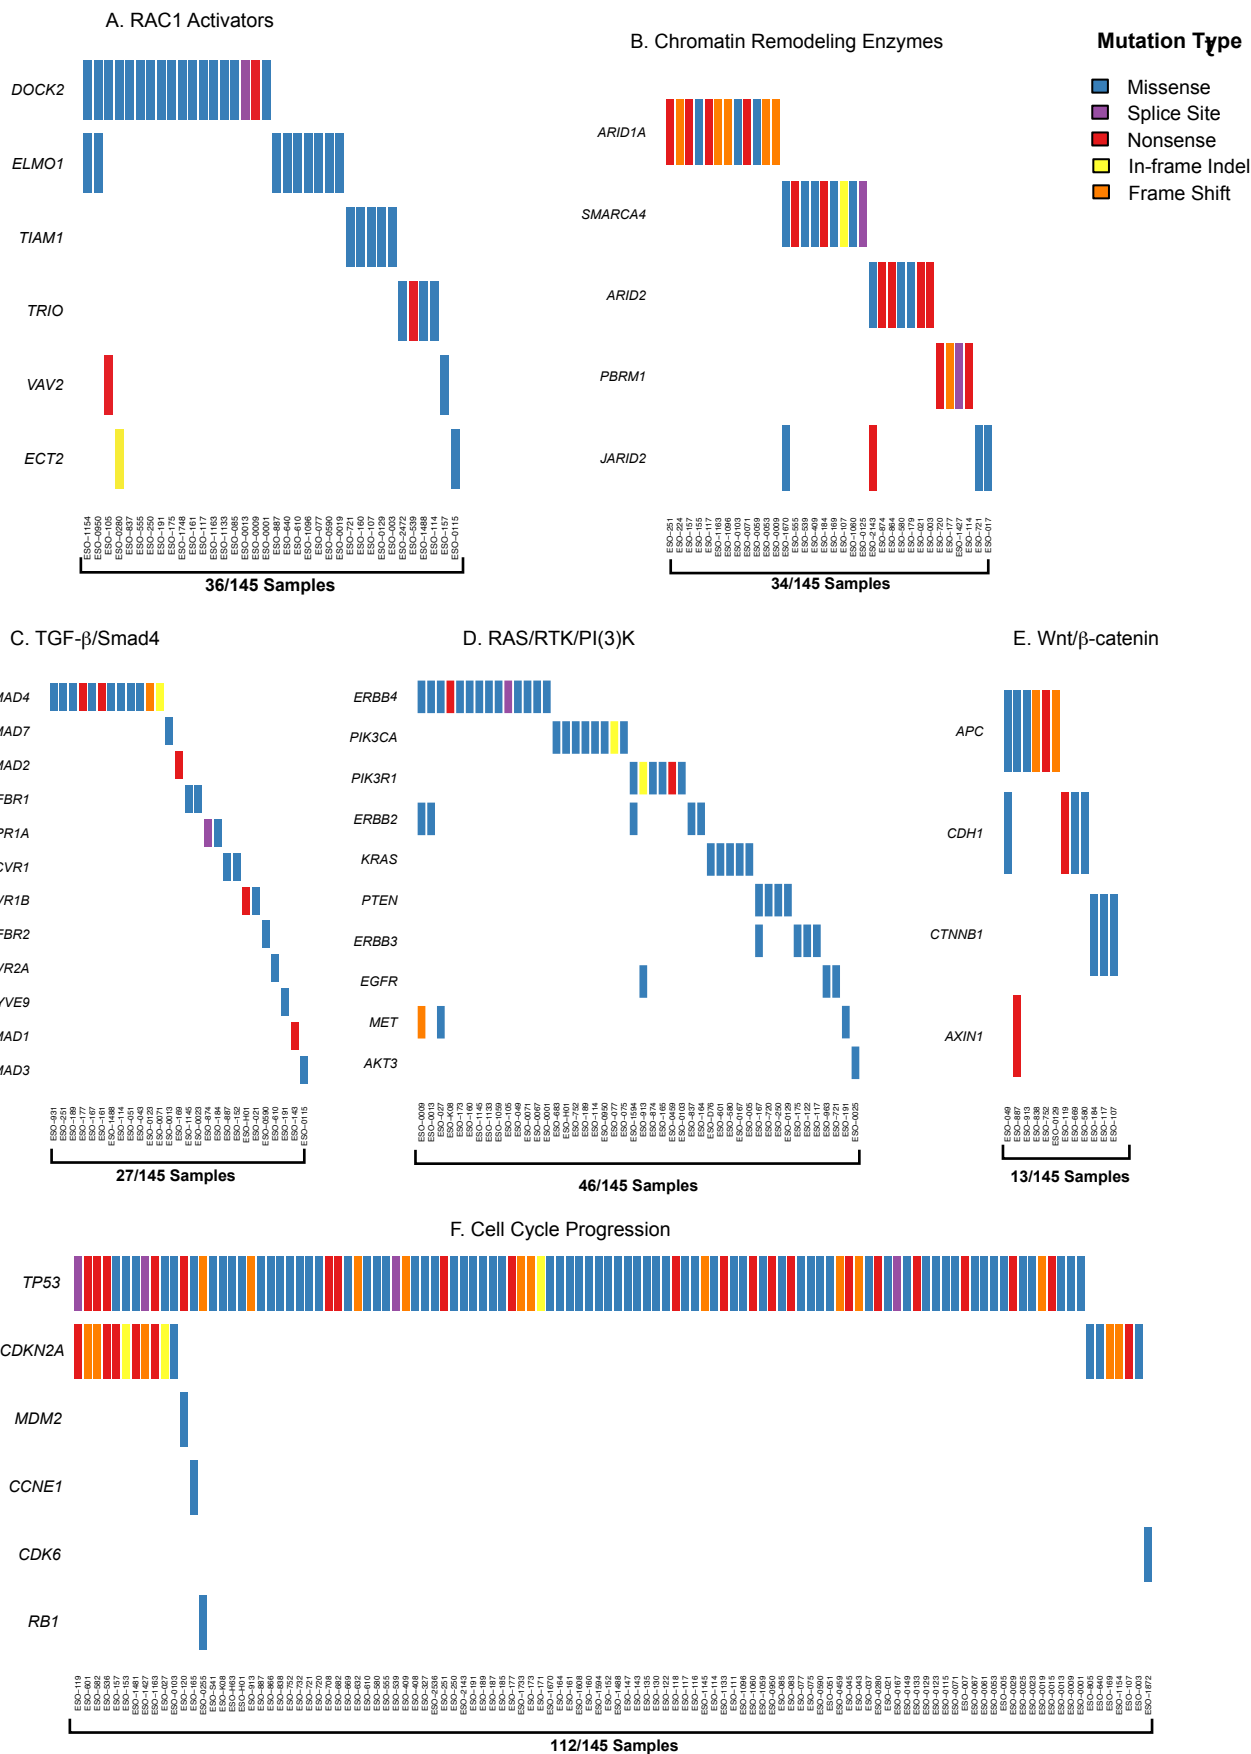

Supplemental Figure 9. Overlap of protein coding modifications in known cancer signal transduction pathways. a) RAC1 activators. b) Chromatin-remodeling enzymes. c) TGF $\beta$ 1(TGF- $\beta$ )/SMAD4. d) KRAS/PI3K/RTK. e) WNT/CTNNB1 ( $\beta$ -catenin). f) Cell cycle progression.

Supplemental Figure 5. Distribution of coding mutations in chromatin remodeling enzymes.

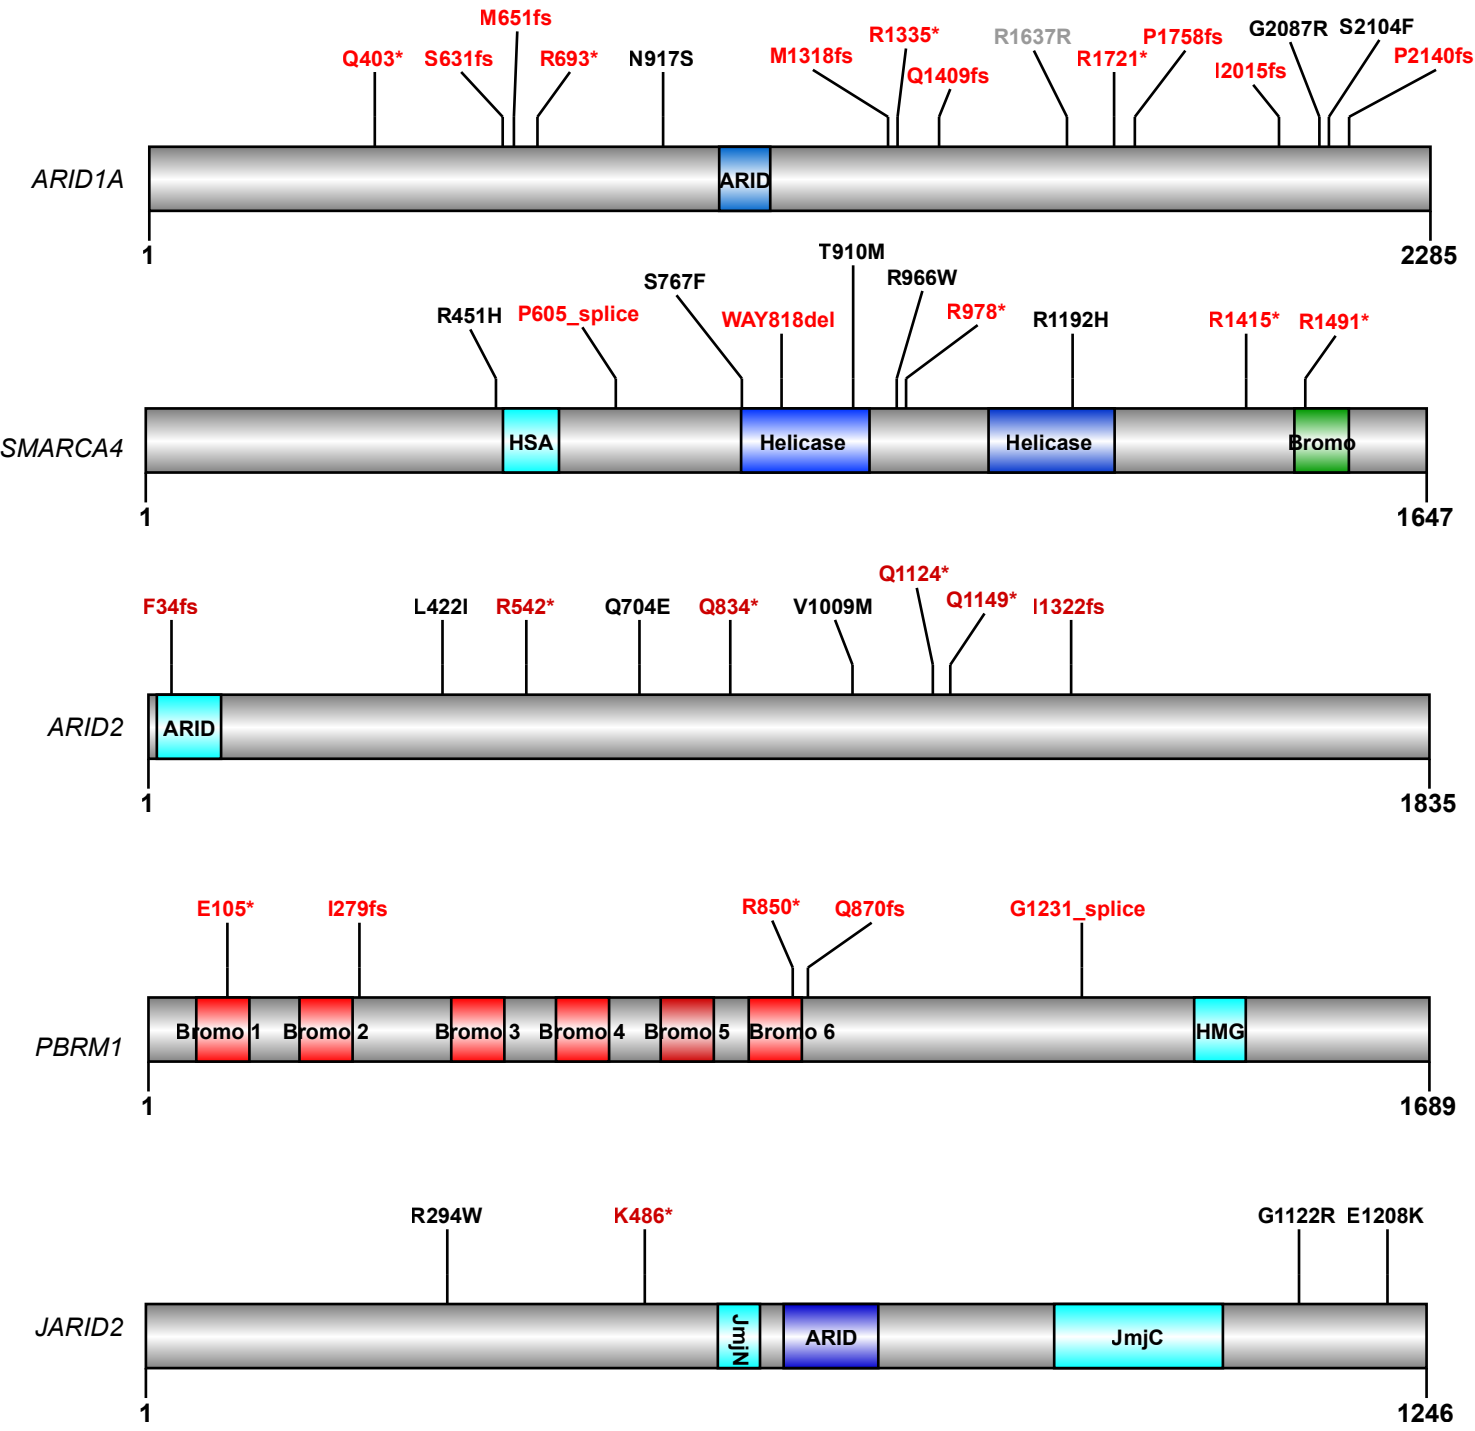



Supplemental Figure 6. Distribution of protein coding mutations in significantly mutated genes.

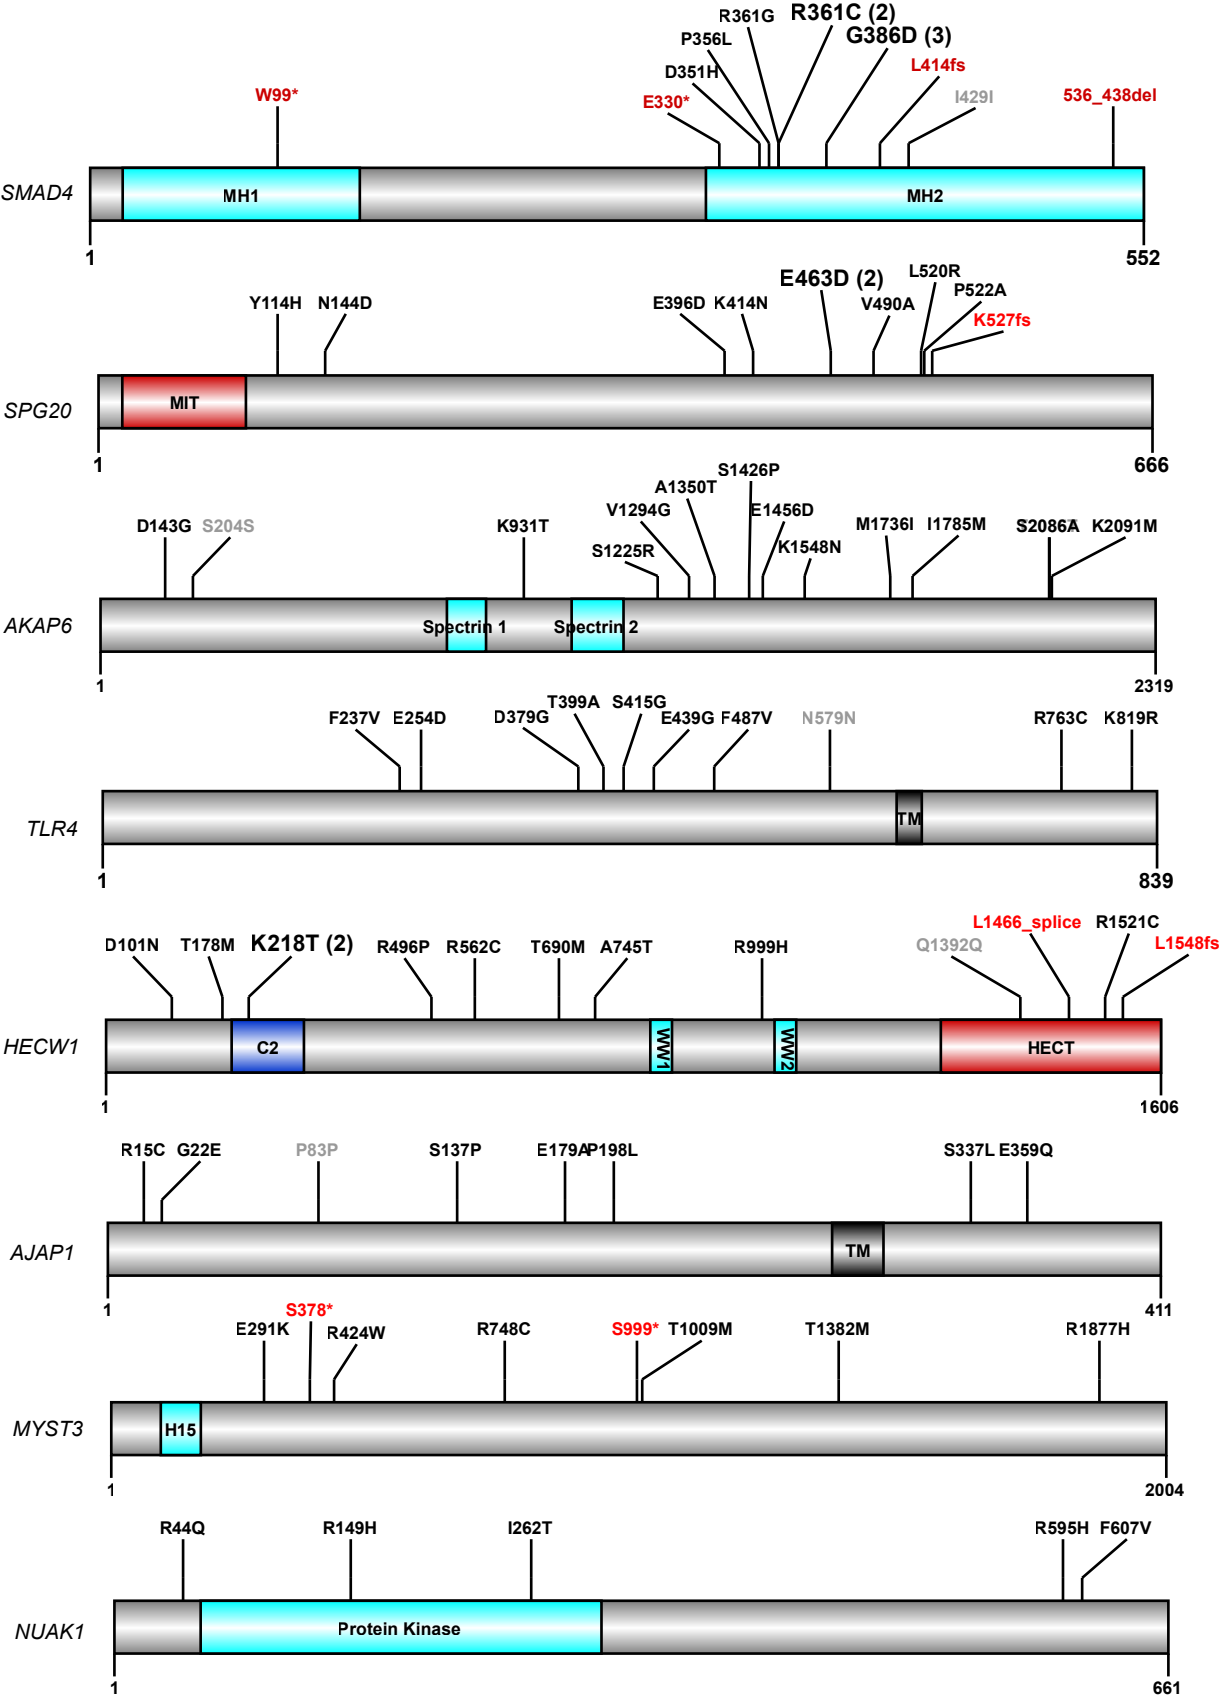

**Supplementary Table 1.EAC sample cohort for WGS and WES.**

Table is sorted by Sample ID (NA represents not available)

**Location Key:**

UM - University of Michigan, Ann Arbor, MI USA

UP - University of Pittsburgh, Pittsburgh, PA USA

ON - Ontario Tissue Bank, Toronto, ON Canada

| Sample ID | Collection | Whole Genome Sequencing | Whole Exome Sequencing | Affymetrix Expression Data | Gender | Age | Ethnicity | Location  | Condensed Location (used in Figure 3) | Tumor Grade     | Barrett's Associated | Pathological T | Pathological N | Clinical M | Smoking Status | Pack Years | Fraction of Ap <sup>+</sup> A Mutations | Non-silent Mutation Rate per Mb (WES) |
|-----------|------------|-------------------------|------------------------|----------------------------|--------|-----|-----------|-----------|---------------------------------------|-----------------|----------------------|----------------|----------------|------------|----------------|------------|-----------------------------------------|---------------------------------------|
| ESO-0001  | UM         | No                      | Yes                    | No                         | Male   | 61  | Caucasian | lower     | Esophagus                             | well            | yes                  | 3              | 1              | 0          | NA             | NA         | 0.32                                    | 7.25                                  |
| ESO-0009  | UM         | No                      | Yes                    | No                         | Male   | 62  | Caucasian | lower     | Esophagus                             | moderately      | yes                  | 3              | 1              | 0          | NA             | NA         | 0.05                                    | 4.07                                  |
| ESO-0013  | UM         | No                      | Yes                    | No                         | Male   | 58  | Caucasian | lower     | Esophagus                             | well            | yes                  | 3              | 1              | 0          | NA             | NA         | 0.37                                    | 9.76                                  |
| ESO-0015  | UM         | No                      | Yes                    | No                         | Female | 76  | Caucasian | lower     | Esophagus                             | well-moderately | yes                  | 3              | 0              | 0          | NA             | NA         | 0.09                                    | 4.82                                  |
| ESO-0019  | UM         | No                      | Yes                    | No                         | Male   | 63  | Caucasian | mid       | Esophagus                             | well-moderately | yes                  | 3              | 1              | 0          | NA             | NA         | 0.33                                    | 4.58                                  |
| ESO-0023  | UM         | No                      | Yes                    | No                         | Male   | 70  | Caucasian | lower     | Esophagus                             | moderately-poor | yes                  | 3              | 1              | 0          | NA             | NA         | 0.12                                    | 4.23                                  |
| ESO-0025  | UM         | No                      | Yes                    | No                         | Male   | 59  | Caucasian | lower     | Esophagus                             | poorly          | yes                  | 1              | 0              | 0          | NA             | NA         | 0.30                                    | 3.81                                  |
| ESO-0029  | UM         | No                      | Yes                    | No                         | Male   | 76  | Caucasian | lower     | Esophagus                             | moderately-poor | yes                  | 3              | 1              | 0          | NA             | NA         | 0.04                                    | 4.47                                  |
| ESO-003   | UM         | No                      | Yes                    | No                         | Female | 63  | Caucasian | lower     | Esophagus                             | well-moderately | yes                  | 2              | 0              | 0          | NA             | NA         | 0.16                                    | 4.47                                  |
| ESO-005   | UM         | No                      | Yes                    | No                         | Female | 61  | Caucasian | lower     | Esophagus                             | moderately-poor | yes                  | 3              | 0              | 0          | NA             | NA         | 0.07                                    | 2.51                                  |
| ESO-0053  | UM         | No                      | Yes                    | No                         | Male   | 84  | Caucasian | lower     | Esophagus                             | moderately-poor | yes                  | 2              | 0              | 0          | NA             | NA         | 0.03                                    | 4.11                                  |
| ESO-0059  | ON         | No                      | Yes                    | No                         | Female | 52  | NA        | cardia    | Cardia/GEJ                            | moderately      | NA                   | T2b            | 1              | 0          | yes            | 20         | 0.16                                    | 2.89                                  |
| ESO-0061  | UM         | No                      | Yes                    | No                         | Male   | 60  | Caucasian | lower     | Esophagus                             | well            | yes                  | 1              | 0              | 0          | NA             | NA         | 0.16                                    | 3.47                                  |
| ESO-0067  | UM         | No                      | Yes                    | No                         | Male   | 68  | Caucasian | cardia    | Cardia/GEJ                            | moderately-poor | yes                  | 3              | 1              | 1          | NA             | NA         | 0.06                                    | 4.49                                  |
| ESO-007   | UM         | No                      | Yes                    | No                         | Male   | 60  | Caucasian | mid       | Esophagus                             | moderately      | yes                  | 4              | 1              | 0          | NA             | NA         | 0.10                                    | 4.68                                  |
| ESO-0071  | UM         | No                      | Yes                    | No                         | Female | 87  | Caucasian | lower     | Esophagus                             | well            | yes                  | 3              | 1              | 0          | NA             | NA         | 0.08                                    | 3.29                                  |
| ESO-0079  | UM         | No                      | Yes                    | No                         | Male   | 74  | Caucasian | lower     | Esophagus                             | poorly          | yes                  | 3              | 1              | 0          | NA             | NA         | 0.08                                    | 3.7                                   |
| ESO-0103  | UM         | No                      | Yes                    | No                         | Male   | 55  | Caucasian | mid       | Esophagus                             | moderately      | yes                  | 3              | 1              | 0          | NA             | NA         | 0.06                                    | 2.97                                  |
| ESO-0115  | UM         | No                      | Yes                    | No                         | Male   | 70  | Caucasian | lower     | Esophagus                             | moderately-poor | yes                  | 1              | 0              | 0          | NA             | NA         | 0.09                                    | 4.76                                  |
| ESO-0123  | UM         | No                      | Yes                    | No                         | Male   | 64  | Caucasian | lower     | Esophagus                             | moderately      | yes                  | 1              | 1              | 0          | NA             | NA         | 0.06                                    | 2.02                                  |
| ESO-0125  | UM         | No                      | Yes                    | No                         | Male   | 76  | Caucasian | mid       | Esophagus                             | poorly          | no                   | 3              | 1              | 1          | NA             | NA         | 0.03                                    | 2.99                                  |
| ESO-0129  | UM         | No                      | Yes                    | No                         | Male   | 51  | Caucasian | cardia    | Cardia/GEJ                            | moderately-poor | no                   | 3              | 0              | 0          | NA             | NA         | 0.02                                    | 6.63                                  |
| ESO-0133  | UM         | No                      | Yes                    | No                         | Male   | 70  | Caucasian | cardia    | Cardia/GEJ                            | moderately      | no                   | 3              | 0              | 0          | NA             | NA         | 0.05                                    | 4.57                                  |
| ESO-0149  | UM         | No                      | Yes                    | No                         | Male   | 74  | Caucasian | lower     | Esophagus                             | moderately      | yes                  | 1              | 1              | 0          | NA             | NA         | 0.04                                    | 3.44                                  |
| ESO-0167  | ON         | No                      | Yes                    | No                         | Male   | 82  | NA        | lower     | Esophagus                             | poorly          | NA                   | T3             | 1              | 0          | NA             | NA         | 0.04                                    | 1.99                                  |
| ESO-017   | UM         | No                      | Yes                    | No                         | Male   | 73  | Caucasian | lower     | Esophagus                             | moderately      | yes                  | 3              | 1              | 0          | NA             | NA         | 0.09                                    | 2.66                                  |
| ESO-0176  | ON         | No                      | Yes                    | No                         | Female | 52  | NA        | cardia    | Cardia/GEJ                            | moderately      | NA                   | T4             | 1              | 0          | yes-former     | 20         | 0.19                                    | 1.83                                  |
| ESO-021   | UM         | No                      | Yes                    | No                         | Male   | 60  | Caucasian | lower     | Esophagus                             | moderately      | yes                  | 3              | 0              | 0          | NA             | NA         | 0.07                                    | 3.16                                  |
| ESO-0255  | ON         | No                      | Yes                    | No                         | Male   | 62  | NA        | lower     | Esophagus                             | poorly          | NA                   | T2a            | 1              | 0          | NA             | NA         | 0.05                                    | 2.37                                  |
| ESO-027   | UM         | No                      | Yes                    | No                         | Male   | 54  | Caucasian | lower     | Esophagus                             | poorly          | yes                  | 3              | 1              | 0          | NA             | NA         | 0.11                                    | 2.59                                  |
| ESO-0280  | ON         | No                      | Yes                    | No                         | Male   | 82  | NA        | cardia    | Cardia/GEJ                            | well            | NA                   | T2,N OS        | 1              | 0          | yes-former     | 35         | 0.32                                    | 5.68                                  |
| ESO-0292  | ON         | No                      | Yes                    | No                         | Male   | 52  | NA        | esophagus | NA                                    | poorly          | NA                   | T3             | 1              | 0          | yes-former     | 35         | 0.03                                    | 23.6                                  |
| ESO-037   | UM         | No                      | Yes                    | No                         | Male   | 48  | Caucasian | lower     | Esophagus                             | moderately-poor | yes                  | 3              | 1              | 0          | NA             | NA         | 0.08                                    | 2.99                                  |
| ESO-043   | UM         | No                      | Yes                    | No                         | Male   | 63  | Caucasian | cardia    | Cardia/GEJ                            | poorly          | yes                  | 3              | 1              | 1          | NA             | NA         | 0.09                                    | 3.48                                  |
| ESO-045   | UM         | No                      | Yes                    | No                         | Female | 78  | Caucasian | cardia    | Cardia/GEJ                            | poorly          | yes                  | 3              | 1              | 0          | NA             | NA         | 0.14                                    | 3.47                                  |
| ESO-0459  | ON         | No                      | Yes                    | No                         | Male   | 67  | NA        | cardia    | Cardia/GEJ                            | well            | NA                   | T3c            | 1              | 0          | yes-former     | 35         | 0.14                                    | 5.5                                   |
| ESO-049   | UM         | No                      | Yes                    | No                         | Male   | 68  | Caucasian | lower     | Esophagus                             | poorly          | yes                  | 2              | 0              | 0          | NA             | NA         | 0.18                                    | 5.94                                  |
| ESO-051   | UM         | No                      | Yes                    | No                         | Male   | 56  | Caucasian | lower     | Esophagus                             | moderately      | yes                  | 2              | 1              | 0          | NA             | NA         | 0.06                                    | 2.55                                  |
| ESO-0590  | UM         | No                      | Yes                    | No                         | Male   | 56  | Caucasian | mid       | Esophagus                             | poorly          | yes                  | 1              | 0              | 0          | NA             | NA         | 0.11                                    | 3.86                                  |
| ESO-075   | UM         | No                      | Yes                    | No                         | Female | 79  | Caucasian | lower     | Esophagus                             | moderately      | yes                  | 3              | 1              | 0          | NA             | NA         | 0.14                                    | 4.1                                   |
| ESO-077   | UM         | No                      | Yes                    | No                         | Male   | 82  | Caucasian | lower     | Esophagus                             | poorly          | yes                  | 3              | 0              | 1          | NA             | NA         | 0.16                                    | 4.88                                  |
| ESO-081   | UM         | No                      | Yes                    | No                         | Male   | 60  | Caucasian | lower     | Esophagus                             | poorly          | yes                  | T2             | 1              | 1          | NA             | NA         | 0.02                                    | 14.6                                  |
| ESO-083   | UM         | No                      | Yes                    | No                         | Male   | 71  | Caucasian | cardia    | Cardia/GEJ                            | well            | yes                  | 3              | 1              | 1          | NA             | NA         | 0.02                                    | 3.15                                  |
| ESO-085   | UM         | No                      | Yes                    | No                         | Male   | 78  | Caucasian | upper     | Esophagus                             | poorly          | yes                  | 3              | 1              | 0          | NA             | NA         | 0.23                                    | 5.94                                  |
| ESO-0950  | ON         | No                      | Yes                    | No                         | Male   | 87  | NA        | cardia    | Cardia/GEJ                            | moderately      | NA                   | T3             | 1              | 0          | yes-former     | 40         | 0.03                                    | 4.68                                  |
| ESO-105   | UM         | No                      | Yes                    | No                         | Male   | 65  | Caucasian | lower     | Esophagus                             | moderately      | yes                  | 1              | 1              | 0          | NA             | NA         | 0.31                                    | 9.12                                  |
| ESO-1059  | UP         | No                      | Yes                    | No                         | Male   | 86  | Caucasian | esophagus | NA                                    | moderately      | yes                  | T1b            | 0              | 0          | yes-former     | 60         | 0.06                                    | 7.24                                  |
| ESO-1060  | UP         | Yes                     | Yes                    | Yes                        | Male   | 78  | Caucasian | esophagus | NA                                    | moderately      | yes                  | T1b            | 0              | 0          | no             | 0          | 0.09                                    | 4.19                                  |
| ESO-107   | UM         | No                      | Yes                    | No                         | Female | 85  | Caucasian | mid       | Esophagus                             | moderately-poor | yes                  | 3              | 1              | 0          | NA             | NA         | 0.08                                    | 3.03                                  |
| ESO-1096  | UP         | No                      | Yes                    | No                         | Male   | 73  | Caucasian | esophagus | NA                                    | poorly          | yes                  | T1b            | 1              | 0          | no             | 0          | 0.01                                    | 4.27                                  |
| ESO-111   | UM         | No                      | Yes                    | No                         | Female | 83  | Caucasian | lower     | Esophagus                             | poorly          | yes                  | 3              | 1              | 0          | NA             | NA         | 0.10                                    | 3.17                                  |
| ESO-1130  | UP         | No                      | Yes                    | No                         | Male   | 69  | Caucasian | esophagus | NA                                    | poorly          | yes                  | T1b            | 0              | 0          | yes-former     | 40         | 0.05                                    | 2.55                                  |
| ESO-1133  | UP         | No                      | Yes                    | No                         | Female | 71  | Caucasian | esophagus | NA                                    | poorly          | no                   | T3             | 2              | 0          | yes-former     | 40         | 0.15                                    | 4.74                                  |

|          |    |     |     |     |        |    |           |           |            |                 |     |          |   |   |            |    |      |      |
|----------|----|-----|-----|-----|--------|----|-----------|-----------|------------|-----------------|-----|----------|---|---|------------|----|------|------|
| ESO-114  | UM | No  | Yes | No  | Male   | 78 | Caucasian | lower     | Esophagus  | moderately      | yes | 3        | 0 | 0 | NA         | NA | 0.10 | 10.8 |
| ESO-1145 | UP | Yes | Yes | No  | Male   | 76 | Caucasian | esophagus | NA         | moderately      | no  | T3       | 1 | 0 | no         | 0  | 0.29 | 5.63 |
| ESO-1154 | UP | No  | Yes | No  | Male   | 75 | Caucasian | esophagus | NA         | moderately      | no  | T3       | 2 | 0 | yes-former | 50 | 0.02 | 2.03 |
| ESO-116  | UM | No  | Yes | No  | Male   | 79 | Caucasian | lower     | Esophagus  | well            | yes | 2        | 1 | 0 | NA         | NA | 0.09 | 3.2  |
| ESO-1163 | UP | Yes | Yes | No  | Male   | 76 | Caucasian | esophagus | NA         | moderately      | no  | T2       | 2 | 0 | yes-former | 20 | 0.18 | 5.03 |
| ESO-117  | UP | No  | Yes | No  | Male   | 83 | Caucasian | esophagus | NA         | moderately      | no  | T3       | 1 | 1 | yes-former | 60 | 0.05 | 3.21 |
| ESO-118  | UM | No  | Yes | No  | Male   | 73 | Caucasian | lower     | Esophagus  | moderately-poor | yes | 3        | 1 | 1 | NA         | NA | 0.12 | 4.64 |
| ESO-119  | UM | No  | Yes | No  | Male   | 67 | Caucasian | lower     | Esophagus  | poorly          | yes | 3        | 1 | 0 | NA         | NA | 0.00 | 2.04 |
| ESO-120  | UM | No  | Yes | No  | Male   | 63 | Caucasian | lower     | Esophagus  | moderately      | yes | 3        | 1 | 0 | NA         | NA | 0.08 | 3.94 |
| ESO-122  | UM | No  | Yes | No  | Male   | 84 | Caucasian | lower     | Esophagus  | moderately-poor | yes | 2        | 1 | 0 | NA         | NA | 0.18 | 6.63 |
| ESO-130  | UP | Yes | Yes | Yes | Male   | 76 | Caucasian | esophagus | NA         | moderately      | yes | T2       | 0 | 0 | yes-former | 10 | 0.06 | 2.67 |
| ESO-131  | UM | No  | Yes | No  | Male   | 70 | Caucasian | lower     | Esophagus  | moderately-poor | no  | 3        | 1 | 0 | NA         | NA | 0.20 | 2.45 |
| ESO-135  | UM | No  | Yes | No  | Male   | 72 | Caucasian | lower     | Esophagus  | poorly          | no  | 3        | 0 | 0 | NA         | NA | 0.06 | 2.3  |
| ESO-137  | UM | No  | Yes | No  | Male   | 66 | Caucasian | lower     | Esophagus  | moderately-poor | yes | 3        | 0 | 0 | NA         | NA | 0.08 | 2.59 |
| ESO-139  | UM | No  | Yes | No  | Male   | 77 | Caucasian | lower     | Esophagus  | moderately      | no  | 3        | 0 | 0 | NA         | NA | 0.39 | 6.01 |
| ESO-141  | UM | No  | Yes | No  | Male   | 52 | Caucasian | lower     | Esophagus  | moderately-poor | no  | 3        | 1 | 0 | NA         | NA | 0.05 | 3.28 |
| ESO-1427 | ON | No  | Yes | No  | Male   | 88 | NA        | cardia    | Cardia/GEJ | moderately      | NA  | T1b      | 0 | 0 | no         | 0  | 0.11 | 4.25 |
| ESO-143  | UM | No  | Yes | No  | Male   | 67 | Caucasian | cardia    | Cardia/GEJ | poorly          | no  | 3        | 1 | 0 | NA         | NA | 0.07 | 3.96 |
| ESO-147  | UM | No  | Yes | No  | Male   | 72 | Caucasian | lower     | Esophagus  | moderately-poor | no  | 3        | 1 | 1 | NA         | NA | 0.12 | 3.54 |
| ESO-1481 | ON | No  | Yes | No  | Male   | 82 | NA        | esophagus | NA         | moderately      | NA  | T2, N OS | 0 | 0 | yes-former | 40 | 0.07 | 3.54 |
| ESO-1488 | ON | No  | Yes | No  | Male   | 82 | NA        | cardia    | Cardia/GEJ | moderately      | NA  | T1b      | 0 | 0 | yes-former | NA | 0.06 | 3.51 |
| ESO-151  | UM | No  | Yes | No  | Male   | 69 | Caucasian | lower     | Esophagus  | poorly          | yes | 4        | 0 | 0 | NA         | NA | 0.04 | 1.97 |
| ESO-152  | UP | No  | Yes | No  | Male   | 73 | Caucasian | esophagus | NA         | poorly          | yes | T1b      | 1 | 0 | yes-former | 60 | 0.17 | 5.44 |
| ESO-153  | UM | No  | Yes | No  | Male   | 75 | Caucasian | lower     | Esophagus  | poorly          | no  | 2        | 1 | 0 | NA         | NA | 0.03 | 3.62 |
| ESO-155  | UM | No  | Yes | No  | Male   | 81 | Caucasian | cardia    | Cardia/GEJ | moderately      | no  | 2        | 1 | 0 | NA         | NA | 0.00 | 2.51 |
| ESO-157  | UM | No  | Yes | No  | Male   | 87 | Caucasian | cardia    | Cardia/GEJ | moderately-poor | no  | 3        | 0 | 0 | NA         | NA | 0.09 | 4.06 |
| ESO-159  | UM | No  | Yes | No  | Male   | 73 | Caucasian | cardia    | Cardia/GEJ | moderately      | no  | 3        | 1 | 1 | NA         | NA | 0.00 | 0.97 |
| ESO-1594 | ON | No  | Yes | No  | Male   | 62 | NA        | cardia    | Cardia/GEJ | moderately      | NA  | T3       | 1 | 0 | no         | 0  | 0.01 | 3.06 |
| ESO-160  | UP | No  | Yes | No  | Male   | 69 | Caucasian | esophagus | NA         | poorly          | no  | T4a      | 3 | 0 | yes-former | 25 | 0.08 | 4.39 |
| ESO-1608 | ON | No  | Yes | No  | Male   | 47 | NA        | cardia    | Cardia/GEJ | moderately      | NA  | T3       | 1 | 0 | yes-former | 15 | 0.08 | 4.25 |
| ESO-161  | UM | No  | Yes | No  | Male   | 79 | Caucasian | cardia    | Cardia/GEJ | well-moderately | no  | 3        | 1 | 0 | NA         | NA | 0.03 | 4.32 |
| ESO-164  | UP | No  | Yes | No  | Male   | 73 | Caucasian | esophagus | NA         | poorly          | yes | T1b      | 0 | 0 | yes-remote | NA | 0.02 | 3.35 |
| ESO-165  | UM | No  | Yes | No  | Male   | 65 | Caucasian | lower     | Esophagus  | moderately      | yes | 3        | 1 | 1 | NA         | NA | 0.05 | 2.77 |
| ESO-167  | UM | No  | Yes | No  | Male   | 32 | Caucasian | cardia    | Cardia/GEJ | poorly          | no  | 3        | 1 | 1 | NA         | NA | 0.04 | 1.67 |
| ESO-1670 | ON | No  | Yes | No  | Male   | 72 | NA        | cardia    | Cardia/GEJ | poorly          | NA  | T2, N OS | 1 | 0 | yes-former | 5  | 0.02 | 4.78 |
| ESO-169  | UM | No  | Yes | No  | Male   | 59 | Caucasian | cardia    | Cardia/GEJ | moderately-poor | no  | 2        | 1 | 1 | NA         | NA | 0.20 | 4.22 |
| ESO-171  | UM | No  | Yes | No  | Male   | 58 | Caucasian | cardia    | Cardia/GEJ | poorly          | no  | 2        | 1 | 0 | NA         | NA | 0.20 | 3.51 |
| ESO-173  | UM | No  | Yes | No  | Male   | 69 | Caucasian | cardia    | Cardia/GEJ | moderately      | no  | 3        | 1 | 0 | NA         | NA | 0.15 | 4.43 |
| ESO-1733 | ON | No  | Yes | No  | Female | 77 | NA        | cardia    | Cardia/GEJ | moderately      | NA  | T3       | 1 | 0 | yes        | 60 | 0.08 | 3.72 |
| ESO-1748 | ON | No  | Yes | No  | Male   | 67 | NA        | cardia    | Cardia/GEJ | moderately      | NA  | T3       | 1 | 0 | no         | 0  | 0.00 | 2.39 |
| ESO-175  | UM | No  | Yes | No  | Male   | 75 | Caucasian | cardia    | Cardia/GEJ | poorly          | no  | 3        | 1 | 0 | NA         | NA | 0.31 | 10   |
| ESO-177  | UM | No  | Yes | No  | Male   | 64 | Caucasian | cardia    | Cardia/GEJ | well-moderately | yes | 3        | 1 | 1 | NA         | NA | 0.01 | 2.3  |
| ESO-179  | UM | No  | Yes | No  | Male   | 74 | Caucasian | cardia    | Cardia/GEJ | moderately-poor | yes | 3        | 1 | 0 | NA         | NA | 0.06 | 2.94 |
| ESO-181  | UM | No  | Yes | No  | Male   | 70 | Caucasian | upper     | Esophagus  | poorly          | no  | 4        | 1 | 0 | NA         | NA | 0.03 | 1.84 |
| ESO-185  | UM | No  | Yes | No  | Male   | 66 | Caucasian | cardia    | Cardia/GEJ | moderately-poor | no  | 3        | 1 | 0 | NA         | NA | 0.03 | 2.58 |
| ESO-187  | UM | No  | Yes | No  | Male   | 60 | Caucasian | cardia    | Cardia/GEJ | poorly          | no  | 4        | 1 | 1 | NA         | NA | 0.12 | 4.35 |
| ESO-1872 | ON | No  | Yes | No  | Male   | 82 | NA        | esophagus | NA         | moderately      | NA  | T3       | 0 | 0 | yes-former | 35 | 0.04 | 3.23 |
| ESO-189  | UM | No  | Yes | No  | Male   | 65 | Caucasian | lower     | Esophagus  | well            | yes | 1        | 0 | 0 | NA         | NA | 0.06 | 2.17 |
| ESO-191  | UM | No  | Yes | No  | Male   | 70 | Caucasian | cardia    | Cardia/GEJ | poorly          | no  | 3        | 1 | 0 | NA         | NA | 0.07 | 5.37 |
| ESO-2143 | ON | No  | Yes | No  | Male   | 67 | NA        | cardia    | Cardia/GEJ | poorly          | NA  | T3       | 1 | 0 | yes-former | 25 | 0.09 | 5.95 |
| ESO-224  | UP | No  | Yes | No  | Male   | 67 | Caucasian | esophagus | NA         | moderately      | no  | T1b      | 0 | 0 | yes-former | 10 | 0.13 | 4.15 |
| ESO-2472 | ON | No  | Yes | No  | Male   | 77 | NA        | cardia    | Cardia/GEJ | poorly          | NA  | T3       | 1 | 0 | yes-former | 40 | 0.07 | 2.1  |
| ESO-250  | UP | No  | Yes | No  | Male   | 75 | Caucasian | esophagus | NA         | poorly          | yes | T1b      | 0 | 0 | yes-former | 38 | 0.17 | 6.05 |

|          |    |     |     |     |        |    |           |           |            |            |     |     |   |   |             |     |      |      |
|----------|----|-----|-----|-----|--------|----|-----------|-----------|------------|------------|-----|-----|---|---|-------------|-----|------|------|
| ESO-251  | UP | No  | Yes | No  | Female | 73 | Caucasian | esophagus | NA         | poorly     | yes | T2  | 0 | 0 | yes-former  | NA  | 0.01 | 2.49 |
| ESO-2536 | ON | No  | Yes | No  | Male   | 57 | NA        | cardia    | Cardia/GEJ | moderately | NA  | T3  | 1 | 0 | yes-former  | 30  | 0.03 | 3.87 |
| ESO-327  | UP | Yes | Yes | Yes | Male   | 57 | Caucasian | esophagus | NA         | poorly     | no  | T3  | 3 | 0 | no          | 0   | 0.30 | 4.42 |
| ESO-408  | UP | No  | Yes | No  | Male   | 78 | Caucasian | esophagus | NA         | poorly     | no  | T3  | 3 | 0 | no          | 0   | 0.04 | 2.26 |
| ESO-409  | UP | Yes | Yes | Yes | Male   | 45 | Caucasian | esophagus | NA         | moderately | yes | T1a | 1 | 0 | no          | 0   | 0.08 | 2.8  |
| ESO-512  | UP | No  | Yes | No  | Female | 74 | Caucasian | esophagus | NA         | poorly     | no  | T2  | 0 | 0 | yes-former  | 98  | 0.03 | 3.07 |
| ESO-536  | UP | No  | Yes | No  | Male   | 59 | Caucasian | esophagus | NA         | moderately | yes | T2  | 0 | 0 | yes-        | 70  | 0.00 | 4.4  |
| ESO-539  | UP | No  | Yes | No  | Male   | 72 | Caucasian | esophagus | NA         | poorly     | yes | T3  | 1 | 0 | yes-former  | 160 | 0.06 | 4.84 |
| ESO-555  | UP | No  | Yes | No  | Male   | 61 | Caucasian | esophagus | NA         | poorly     | yes | T3  | 2 | 0 | no          | 0   | 0.05 | 2.75 |
| ESO-580  | UP | No  | Yes | No  | Female | 71 | Caucasian | esophagus | NA         | moderately | yes | T1b | 0 | 0 | no          | 0   | 0.14 | 2.75 |
| ESO-582  | UP | Yes | Yes | Yes | Male   | 53 | Caucasian | esophagus | NA         | poorly     | no  | T3  | 3 | 0 | yes-current | 40  | 0.15 | 2.98 |
| ESO-601  | UP | Yes | Yes | Yes | Male   | 76 | Caucasian | esophagus | NA         | moderately | yes | T1b | 2 | 0 | yes-former  | 20  | 0.03 | 3.5  |
| ESO-610  | UP | No  | Yes | No  | Male   | 61 | Caucasian | esophagus | NA         | poorly     | yes | T2  | 0 | 0 | yes-former  | NA  | 0.01 | 2.89 |
| ESO-632  | UP | No  | Yes | No  | Female | 69 | Caucasian | esophagus | NA         | moderately | yes | T2  | 0 | 0 | yes-former  | 50  | 0.02 | 5.62 |
| ESO-640  | UP | No  | Yes | No  | Male   | 61 | NA        | esophagus | NA         | poorly     | NA  | T3  | 1 | 0 | NA          | NA  | 0.01 | 3.33 |
| ESO-669  | UP | No  | Yes | No  | Male   | 62 | Caucasian | esophagus | NA         | poorly     | yes | T3  | 1 | 0 | yes-current | 44  | 0.02 | 2.98 |
| ESO-682  | UP | Yes | Yes | Yes | Male   | 59 | Caucasian | esophagus | NA         | moderately | yes | T1b | 0 | 0 | yes-current | 120 | 0.11 | 3.79 |
| ESO-683  | UP | No  | Yes | No  | Male   | 58 | Caucasian | esophagus | NA         | moderately | no  | T2  | 0 | 0 | no          | 0   | 0.00 | 2.58 |
| ESO-708  | UP | No  | Yes | No  | Female | 78 | Caucasian | esophagus | NA         | moderately | yes | T3  | 2 | 0 | yes-former  | NA  | 0.09 | 4.03 |
| ESO-717  | UP | No  | Yes | No  | Female | 80 | Caucasian | esophagus | NA         | poorly     | no  | T3  | 2 | 0 | no          | 0   | 0.02 | 19.7 |
| ESO-718  | UP | Yes | Yes | Yes | Male   | 57 | Caucasian | esophagus | NA         | moderately | yes | T3  | 2 | 0 | yes-former  | 20  | 0.02 | 2.64 |
| ESO-720  | UP | No  | Yes | No  | Male   | 70 | Caucasian | esophagus | NA         | moderately | no  | T3  | 3 | 0 | yes-current | 50  | 0.03 | 3.64 |
| ESO-721  | UP | Yes | Yes | Yes | Female | 68 | Caucasian | esophagus | NA         | moderately | yes | T1b | 0 | 0 | no          | 0   | 0.06 | 8.35 |
| ESO-732  | UP | No  | Yes | No  | Male   | 62 | Caucasian | esophagus | NA         | moderately | yes | T1b | 0 | 0 | yes-former  | 44  | 0.19 | 5.03 |
| ESO-752  | UP | No  | Yes | No  | Male   | 77 | Caucasian | esophagus | NA         | moderately | yes | T1b | 0 | 0 | yes-former  | 60  | 0.08 | 5.45 |
| ESO-774  | UP | Yes | No  | Yes | Male   | 54 | Caucasian | esophagus | NA         | poorly     | no  | T3  | 3 | 0 | yes-former  | 7   | NA   | NA   |
| ESO-805  | UP | No  | Yes | No  | Male   | 75 | Caucasian | esophagus | NA         | moderately | no  | T3  | 2 | 0 | yes-current | 82  | 0.00 | 3.45 |
| ESO-837  | UP | Yes | Yes | Yes | Male   | 58 | Caucasian | esophagus | NA         | moderately | yes | T1b | 0 | 0 | no          | 0   | 0.05 | 3.49 |
| ESO-838  | UP | Yes | Yes | Yes | Male   | 81 | Caucasian | esophagus | NA         | moderately | yes | T1b | 0 | 0 | no          | 0   | 0.12 | 3.93 |
| ESO-859  | UP | No  | Yes | No  | Male   | 81 | Caucasian | esophagus | NA         | poorly     | no  | T3  | 3 | 0 | yes-former  | 40  | 0.01 | 50.9 |
| ESO-864  | UP | No  | Yes | No  | Male   | 69 | Caucasian | esophagus | NA         | moderately | yes | T2  | 1 | 0 | yes-former  | NA  | 0.00 | 1.54 |
| ESO-866  | UP | No  | Yes | No  | Male   | 61 | Caucasian | esophagus | NA         | poorly     | no  | T2  | 2 | 0 | yes-former  | 5   | 0.13 | 3.31 |
| ESO-874  | UP | Yes | Yes | Yes | Male   | 72 | Caucasian | esophagus | NA         | poorly     | yes | T3  | 2 | 0 | no          | 0   | 0.07 | 2.99 |

|         |    |     |     |     |        |    |           |           |            |                 |     |     |   |   |            |    |      |      |
|---------|----|-----|-----|-----|--------|----|-----------|-----------|------------|-----------------|-----|-----|---|---|------------|----|------|------|
| ESO-887 | UP | No  | Yes | No  | Male   | 84 | Caucasian | esophagus | NA         | well            | yes | T1a | 0 | 0 | yes-former | NA | 0.05 | 9.02 |
| ESO-913 | UP | Yes | Yes | Yes | Female | 64 | Caucasian | esophagus | NA         | moderately      | no  | T3  | 1 | 0 | no         | 0  | 0.09 | 2.86 |
| ESO-916 | UP | No  | Yes | No  | Male   | 66 | Caucasian | esophagus | NA         | poorly          | no  | T3  | 3 | 0 | yes-       | 60 | 0.06 | 2.29 |
| ESO-931 | UP | No  | Yes | No  | Male   | 66 | Caucasian | esophagus | NA         | well            | yes | T1b | 0 | 0 | no         | 0  | 0.03 | 1.34 |
| ESO-963 | UP | No  | Yes | No  | Male   | 75 | Caucasian | esophagus | NA         | poorly          | no  | T3  | 1 | 0 | no         | 0  | 0.04 | 2.78 |
| ESO-D76 | UM | No  | Yes | No  | Female | 57 | Caucasian | cardia    | Cardia/GEJ | well            | NA  | T2  | 0 | 0 | NA         | NA | 0.03 | 2.31 |
| ESO-H01 | UM | No  | Yes | No  | Female | 78 | Caucasian | cardia    | Cardia/GEJ | poorly          | NA  | T3  | 1 | 0 | NA         | NA | 0.03 | 3.99 |
| ESO-H63 | UM | No  | Yes | No  | Female | 66 | Caucasian | cardia    | Cardia/GEJ | moderately-poor | NA  | T3  | 1 | 0 | NA         | NA | 0.15 | 2.34 |
| ESO-K08 | UM | No  | Yes | No  | Female | 63 | Caucasian | lower     | Esophagus  | poorly          | NA  | T3  | 0 | 0 | NA         | NA | 0.08 | 3.97 |
| ESO-R61 | UM | No  | Yes | No  | Female | 60 | Caucasian | cardia    | Cardia/GEJ | poorly          | NA  | T2  | 2 | 1 | NA         | NA | 0.03 | 1.63 |
| ESO-S41 | UM | No  | Yes | No  | Female | 87 | Caucasian | cardia    | Cardia/GEJ | poorly          | NA  | T3  | 0 | 0 | NA         | NA | 0.04 | 2.36 |

**Supplementary Table 2. Coverage, mutation, and rearrangement frequencies for individual samples generated by WGS.**

Table is sorted in ascending order by mutation rate.

| <b>Individual</b>  | <b>Tumor Coverage</b> | <b>Normal Coverage</b> | <b>Genomic Mutations</b> | <b>Mutations per Mb</b> | <b>Rearrangements</b> |
|--------------------|-----------------------|------------------------|--------------------------|-------------------------|-----------------------|
| <b>ESO-0874</b>    | 38.0                  | 40.6                   | 18,881                   | 7.08                    | 170                   |
| <b>ESO-0601</b>    | 74.8                  | 27.2                   | 19,368                   | 7.11                    | 196                   |
| <b>ESO-409</b>     | 45.8                  | 28.8                   | 21,068                   | 7.73                    | 182                   |
| <b>ESO-130</b>     | 50.9                  | 30.0                   | 21,417                   | 7.85                    | 109                   |
| <b>ESO-913</b>     | 27.6                  | 31.5                   | 20,671                   | 7.88                    | 163                   |
| <b>ESO-718</b>     | 43.8                  | 29.6                   | 22,321                   | 8.24                    | 195                   |
| <b>ESO-0837</b>    | 60.2                  | 34.8                   | 25,779                   | 9.53                    | 190                   |
| <b>ESO-0582</b>    | 54.7                  | 41.8                   | 26,452                   | 9.77                    | 193                   |
| <b>ESO-774</b>     | 30.5                  | 27.5                   | 25,870                   | 10.04                   | 153                   |
| <b>ESO-1060</b>    | 68.0                  | 27.1                   | 30,846                   | 11.27                   | 402                   |
| <b>ESO-838</b>     | 80.6                  | 22.7                   | 30,893                   | 11.44                   | 147                   |
| <b>ESO-682</b>     | 38.7                  | 30.7                   | 34,097                   | 12.65                   | 114                   |
| <b>ESO-721</b>     | 43.0                  | 30.0                   | 40,308                   | 14.92                   | 360                   |
| <b>ESO-1163</b>    | 38.7                  | 28.0                   | 45,806                   | 16.92                   | 77                    |
| <b>ESO-0327</b>    | 39.5                  | 33.4                   | 60,213                   | 22.24                   | 127                   |
| <b>ESO-1145</b>    | 55.6                  | 21.5                   | 66,225                   | 25.16                   | 174                   |
| <b>EAC samples</b> | <b>44.8</b>           | <b>29.8</b>            | <b>26,161</b>            | <b>9.9</b>              | <b>172.0</b>          |

**Supplemental Table 3. Mutation rates and transition-transversion ratios in regions of the genome as detected by WGS (n=16)**

Table is sorted by Sample ID

| <b>Sample ID</b>                     | <b>Exon Mutation Rate<br/>(mutation/Mb)</b> | <b>Exon Ti:Tv Ratio</b> | <b>Intron Mutation Rate<br/>(mutation/Mb)</b> | <b>Intron Ti:Tv Ratio</b> | <b>IGR Mutation Rate<br/>(mutation/Mb)</b> | <b>IGR Ti:Tv<br/>Ratio</b> |
|--------------------------------------|---------------------------------------------|-------------------------|-----------------------------------------------|---------------------------|--------------------------------------------|----------------------------|
| ESO-0327                             | 6.60                                        | 0.90                    | 16.05                                         | 0.54                      | 31.49                                      | 0.47                       |
| ESO-0582                             | 5.09                                        | 1.38                    | 8.60                                          | 0.62                      | 13.80                                      | 0.76                       |
| ESO-0601                             | 8.02                                        | 2.10                    | 8.86                                          | 1.38                      | 13.96                                      | 1.16                       |
| ESO-0837                             | 7.26                                        | 1.49                    | 8.60                                          | 0.78                      | 13.51                                      | 0.77                       |
| ESO-0874                             | 4.71                                        | 1.40                    | 6.33                                          | 0.96                      | 10.20                                      | 0.82                       |
| ESO-1060                             | 7.43                                        | 1.48                    | 10.83                                         | 0.89                      | 17.68                                      | 0.79                       |
| ESO-1145                             | 10.56                                       | 0.99                    | 19.96                                         | 0.59                      | 37.37                                      | 0.52                       |
| ESO-1163                             | 7.64                                        | 1.30                    | 13.74                                         | 0.71                      | 24.57                                      | 0.60                       |
| ESO-130                              | 5.40                                        | 2.35                    | 7.69                                          | 1.03                      | 12.38                                      | 0.92                       |
| ESO-409                              | 4.23                                        | 1.50                    | 7.70                                          | 0.94                      | 12.15                                      | 0.82                       |
| ESO-682                              | 5.88                                        | 1.51                    | 10.28                                         | 0.76                      | 18.44                                      | 0.63                       |
| ESO-718                              | 4.66                                        | 2.63                    | 6.07                                          | 1.14                      | 9.24                                       | 0.98                       |
| ESO-721                              | 11.32                                       | 0.72                    | 12.45                                         | 0.65                      | 17.86                                      | 0.59                       |
| ESO-774                              | 6.50                                        | 1.23                    | 8.27                                          | 0.80                      | 13.85                                      | 0.69                       |
| ESO-838                              | 7.70                                        | 1.52                    | 11.42                                         | 0.96                      | 19.34                                      | 0.79                       |
| ESO-913                              | 5.53                                        | 0.87                    | 6.70                                          | 0.63                      | 10.88                                      | 0.63                       |
| <b>Median across EAC<br/>Samples</b> | <b>6.55</b>                                 | <b>1.44</b>             | <b>8.73</b>                                   | <b>0.79</b>               | <b>13.91</b>                               | <b>0.76</b>                |

**Supplementary Table 5. Predicted in-frame fusion proteins detected by dRanger**

| <b>Tumor</b>    | <b>Fusion</b>                      | <b>Fusion Sites</b>                  |
|-----------------|------------------------------------|--------------------------------------|
| <b>ESO-0327</b> | C1orf27 exon 11 to DISC1 exon 9    | chr1:186,371,326 to chr1:232,022,609 |
| <b>ESO-0327</b> | HS3ST4 exon 1 to RNF213 exon 38    | chr16:25,861,556 to chr17:78,331,243 |
| <b>ESO-0327</b> | IGF2BP2 exon 3 to TRA2B exon 2     | chr3:185,435,229 to chr3:185,644,022 |
| <b>ESO-0327</b> | LAMA3 exon 12 to ZNF521 exon 4     | chr18:21,364,573 to chr18:22,838,213 |
| <b>ESO-0582</b> | ITPKB exon 3 to CAB31 exon 5       | chr1:226,836,046 to chr1:227,167,335 |
| <b>ESO-0582</b> | MICAL2 exon 3 to MICALCL exon 5    | chr11:12,195,125 to chr11:12,343,815 |
| <b>ESO-0582</b> | MLLT3 exon 2 to DENND1A exon 2     | chr9:20,582,257 to chr9:126,603,989  |
| <b>ESO-0582</b> | DNM2 exon 14 to SMARCA4 to exon 11 | chr19:10,920,226 to chr19:11,110,620 |
| <b>ESO-0582</b> | ITPR2 exon 6 to TMBIM4 exon 4      | chr12:26,870,402 to chr12:66,542,550 |
| <b>ESO-0601</b> | LEKR1 exon 6 to CCDC50 exon 6      | chr3:156,656,946 to chr3:191,094,248 |
| <b>ESO-0837</b> | COIL exon 4 to MSI2 exon 9         | chr17:55,026,587 to chr17:55,686,932 |
| <b>ESO-0837</b> | GRIK2 exon 6 to NHSL1 exon 3       | chr6:102157848 to chr6:138791,528    |
| <b>ESO-0837</b> | MCC exon 15 to SPOCK1 exon 2       | chr5:112381747 to chr5:136723830     |
| <b>ESO-0874</b> | FBXL17 exon 7 to HPSE2 exon 4      | chr5:107288297 to chr10:100554400    |
| <b>ESO-0874</b> | SLC30A7 exon 7 to MAP3K9           | chr1:101384909 to chr14:71268480     |
| <b>ESO-1060</b> | GALNT7 exon 2 to AXIN1 exon 5      | chr4:174143721 to chr16:352242       |
| <b>ESO-1060</b> | BCAT2 exon 3 to HSD17B14 exon 3    | chr19:49307168 to chr19:49336857     |
| <b>ESO-1060</b> | UNC13B exon 11 to CABIN1 exon 29   | chr9:35347072 to chr22:24537512      |
| <b>ESO-1060</b> | KIF13A exon 2 to DEK exon 4        | chr6:17979475 to chr6:18256492       |
| <b>ESO-1060</b> | MAP4K4 exon 2 to DPP10 exon 1      | chr2:102356410 to chr2:115318223     |
| <b>ESO-1060</b> | MAPT exon 11 to KIAA1267 exon 5    | chr17:44079610 to chr17:44139887     |
| <b>ESO-1060</b> | PBX1 exon 2 to MECOM exon 1        | chr1:164637557 to chr3:169354157     |
| <b>ESO-1060</b> | GNAL exon 5 to NPC1 to exon 1      | chr18:11802335 to chr18:21161861     |
| <b>ESO-1060</b> | EIF3H exon 2 to RAD21 exon 7       | chr8:117723426 to chr8:117869012     |
| <b>ESO-1145</b> | DOHH exon 3 to C19orf29 exon 2     | chr19:3493845 to chr19:3623636       |
| <b>ESO-1145</b> | MLLT3 exon 6 to KIAA1797 exon 13   | chr9:20370318 to chr9:20787328       |
| <b>ESO-409</b>  | ANO10 exon 12 to MATR3 exon 7      | chr3:43442906 to chr5:138653804      |
| <b>ESO-682</b>  | PLEKHM3 exon 4 to CLOCK exon 8     | chr2:208805470 to chr4:56336008      |
| <b>ESO-682</b>  | TRIM31 exon 5 to SAP30BP exon 6    | chr6:30076882 to chr17:73698121      |
| <b>ESO-718</b>  | ATAD5 exon 11 to ADAP2 exon 10     | chr17:29192600 to chr17:29283849     |
| <b>ESO-718</b>  | FAM38B exon 4 to PTPN2 exon 3      | chr18:10914508 to chr18:12840919     |
| <b>ESO-718</b>  | SYT9 exon 3 to TTC28 exon 1        | chr11:7350135 to chr22:29065458      |
| <b>ESO-721</b>  | ADA exon 3 to ZSWIM3 exon 1        | chr20:43258196 to chr20:44492697     |
| <b>ESO-838</b>  | CABLES1 exon 1 to TTC39C exon 1    | chr18:20721977 to chr18:21599220     |
| <b>ESO-838</b>  | ABCA13 exon 54 to SNX30 exon 2     | chr7:48565308 to chr9:115566709      |
| <b>ESO-913</b>  | ARL15 exon 4 to HOMER1 exon 8      | chr5:53328974 to chr5:78691868       |
| <b>ESO-913</b>  | NPAS3 exon 5 to HUWE1 exon 6       | chr14:33946315 to chr23:53673431     |
| <b>ESO-913</b>  | AKAP6 exon 8 to SFTA3 exon 2       | chr14:33124678 to chr14:36968978     |



**Supplementary Table 6. Mutation percentage detected by WGS.**

Table is sorted in descending order by percent of mutations across all EAC samples

**Fraction of mutation by WGS**

|                                      | <b>Number of<br/>Individuals</b> | <b>A&gt;C</b> | <b>A&gt;G</b> | <b>C&gt;T</b> | <b>C&gt;A</b> | <b>A&gt;T</b> | <b>C&gt;G</b> |
|--------------------------------------|----------------------------------|---------------|---------------|---------------|---------------|---------------|---------------|
| <b>ESO-0327</b>                      | 1                                | 0.54          | 0.24          | 0.07          | 0.06          | 0.08          | 0.02          |
| <b>ESO-0582</b>                      | 1                                | 0.35          | 0.22          | 0.14          | 0.11          | 0.10          | 0.07          |
| <b>ESO-0601</b>                      | 1                                | 0.11          | 0.15          | 0.38          | 0.16          | 0.10          | 0.10          |
| <b>ESO-0837</b>                      | 1                                | 0.22          | 0.20          | 0.22          | 0.23          | 0.08          | 0.05          |
| <b>ESO-0874</b>                      | 1                                | 0.27          | 0.22          | 0.23          | 0.15          | 0.09          | 0.05          |
| <b>ESO-1060</b>                      | 1                                | 0.26          | 0.18          | 0.24          | 0.18          | 0.08          | 0.05          |
| <b>ESO-1145</b>                      | 1                                | 0.50          | 0.24          | 0.08          | 0.06          | 0.09          | 0.03          |
| <b>ESO-1163</b>                      | 1                                | 0.41          | 0.23          | 0.14          | 0.11          | 0.09          | 0.03          |
| <b>ESO-130</b>                       | 1                                | 0.21          | 0.19          | 0.27          | 0.15          | 0.11          | 0.07          |
| <b>ESO-409</b>                       | 1                                | 0.30          | 0.19          | 0.24          | 0.13          | 0.09          | 0.06          |
| <b>ESO-682</b>                       | 1                                | 0.39          | 0.20          | 0.18          | 0.10          | 0.09          | 0.04          |
| <b>ESO-718</b>                       | 1                                | 0.12          | 0.18          | 0.33          | 0.19          | 0.10          | 0.08          |
| <b>ESO-721</b>                       | 1                                | 0.21          | 0.15          | 0.21          | 0.15          | 0.11          | 0.15          |
| <b>ESO-774</b>                       | 1                                | 0.24          | 0.19          | 0.21          | 0.19          | 0.11          | 0.06          |
| <b>ESO-838</b>                       | 1                                | 0.33          | 0.22          | 0.19          | 0.11          | 0.09          | 0.05          |
| <b>ESO-913</b>                       | 1                                | 0.29          | 0.17          | 0.20          | 0.23          | 0.08          | 0.04          |
| <b>Median across all EAC Samples</b> | <b>16</b>                        | <b>0.28</b>   | <b>0.20</b>   | <b>0.21</b>   | <b>0.15</b>   | <b>0.09</b>   | <b>0.05</b>   |

**Supplementary Table 8. Mutation percentage detected by WGS in exons.**

Table is sorted in descending order by percent of mutations across all EAC samples

**Fraction of mutation by WGS in exons**

|                                      | <b>Number of<br/>Individuals</b> | <b>C&gt;T</b> | <b>C&gt;A</b> | <b>A&gt;C</b> | <b>A&gt;G</b> | <b>C&gt;G</b> | <b>A&gt;T</b> |
|--------------------------------------|----------------------------------|---------------|---------------|---------------|---------------|---------------|---------------|
| <b>ESO-0327</b>                      | 1                                | 0.30          | 0.11          | 0.34          | 0.18          | 0.03          | 0.04          |
| <b>ESO-0582</b>                      | 1                                | 0.36          | 0.15          | 0.17          | 0.22          | 0.07          | 0.03          |
| <b>ESO-0601</b>                      | 1                                | 0.64          | 0.12          | 0.05          | 0.06          | 0.10          | 0.03          |
| <b>ESO-0837</b>                      | 1                                | 0.46          | 0.24          | 0.07          | 0.14          | 0.04          | 0.04          |
| <b>ESO-0874</b>                      | 1                                | 0.46          | 0.17          | 0.10          | 0.12          | 0.08          | 0.07          |
| <b>ESO-1060</b>                      | 1                                | 0.46          | 0.19          | 0.11          | 0.13          | 0.08          | 0.03          |
| <b>ESO-1145</b>                      | 1                                | 0.34          | 0.10          | 0.32          | 0.14          | 0.05          | 0.05          |
| <b>ESO-1163</b>                      | 1                                | 0.44          | 0.15          | 0.21          | 0.11          | 0.05          | 0.04          |
| <b>ESO-130</b>                       | 1                                | 0.60          | 0.13          | 0.09          | 0.07          | 0.09          | 0.02          |
| <b>ESO-409</b>                       | 1                                | 0.56          | 0.11          | 0.11          | 0.10          | 0.07          | 0.05          |
| <b>ESO-682</b>                       | 1                                | 0.54          | 0.15          | 0.15          | 0.09          | 0.04          | 0.03          |
| <b>ESO-718</b>                       | 1                                | 0.61          | 0.15          | 0.06          | 0.10          | 0.04          | 0.04          |
| <b>ESO-721</b>                       | 1                                | 0.35          | 0.18          | 0.09          | 0.06          | 0.22          | 0.10          |
| <b>ESO-774</b>                       | 1                                | 0.42          | 0.19          | 0.13          | 0.12          | 0.08          | 0.05          |
| <b>ESO-838</b>                       | 1                                | 0.47          | 0.13          | 0.20          | 0.12          | 0.06          | 0.02          |
| <b>ESO-913</b>                       | 1                                | 0.40          | 0.34          | 0.08          | 0.08          | 0.05          | 0.06          |
| <b>Median across all EAC Samples</b> | <b>16</b>                        | <b>0.46</b>   | <b>0.15</b>   | <b>0.11</b>   | <b>0.12</b>   | <b>0.06</b>   | <b>0.04</b>   |

**Supplementary Table 10. Mutation rates of AA>C only and all other mutations binned by expression**

Table is sorted in descending order by EAC sample name

**Mutation rates binned by expression (0-25% bin represents lowest expressed genes, 75-100% represents highest expressed genes)**

| Sample                              | AA>C Only - 0-25%<br>Expression<br>(mutations per<br>bases covered) | AA>C Only - 25-50%<br>Expression<br>(mutations per<br>bases covered) | AA>C Only - 50-75%<br>Expression<br>(mutations per<br>bases covered) | AA>C Only - 75-<br>100% Expression<br>(mutations per<br>bases covered) | All Other Mutations -<br>0-25% Expression<br>(mutations per<br>bases covered) | All Other Mutations -<br>25-50% Expression<br>(mutations per bases<br>covered) | All Other Mutations -<br>50-75% Expression<br>(mutations per bases<br>covered) | All Other Mutations -<br>75-100% Expression<br>(mutations per bases<br>covered) |
|-------------------------------------|---------------------------------------------------------------------|----------------------------------------------------------------------|----------------------------------------------------------------------|------------------------------------------------------------------------|-------------------------------------------------------------------------------|--------------------------------------------------------------------------------|--------------------------------------------------------------------------------|---------------------------------------------------------------------------------|
| ESO-0327                            | 6.86E-05                                                            | 3.40E-05                                                             | 1.39E-05                                                             | 8.87E-06                                                               | 2.23E-05                                                                      | 1.30E-05                                                                       | 7.61E-06                                                                       | 6.94E-06                                                                        |
| ESO-0582                            | 1.73E-05                                                            | 9.00E-06                                                             | 5.60E-06                                                             | 2.45E-06                                                               | 1.12E-05                                                                      | 8.09E-06                                                                       | 6.43E-06                                                                       | 5.70E-06                                                                        |
| ESO-0601                            | 2.59E-06                                                            | 1.80E-06                                                             | 1.31E-06                                                             | 1.24E-06                                                               | 1.05E-05                                                                      | 9.62E-06                                                                       | 9.57E-06                                                                       | 7.62E-06                                                                        |
| ESO-0837                            | 1.13E-05                                                            | 5.81E-06                                                             | 3.11E-06                                                             | 2.17E-06                                                               | 1.21E-05                                                                      | 8.64E-06                                                                       | 7.43E-06                                                                       | 5.79E-06                                                                        |
| ESO-0874                            | 1.04E-05                                                            | 6.13E-06                                                             | 4.06E-06                                                             | 1.61E-06                                                               | 8.27E-06                                                                      | 6.01E-06                                                                       | 5.85E-06                                                                       | 4.68E-06                                                                        |
| ESO-1060                            | 1.66E-05                                                            | 8.14E-06                                                             | 5.64E-06                                                             | 2.40E-06                                                               | 1.49E-05                                                                      | 1.10E-05                                                                       | 8.86E-06                                                                       | 7.30E-06                                                                        |
| ESO-130                             | 9.30E-06                                                            | 5.17E-06                                                             | 2.73E-06                                                             | 1.62E-06                                                               | 1.09E-05                                                                      | 7.82E-06                                                                       | 6.25E-06                                                                       | 5.27E-06                                                                        |
| ESO-409                             | 1.37E-05                                                            | 7.66E-06                                                             | 3.30E-06                                                             | 1.76E-06                                                               | 1.02E-05                                                                      | 7.58E-06                                                                       | 5.73E-06                                                                       | 5.25E-06                                                                        |
| ESO-682                             | 2.81E-05                                                            | 1.52E-05                                                             | 8.60E-06                                                             | 3.23E-06                                                               | 1.44E-05                                                                      | 9.94E-06                                                                       | 7.42E-06                                                                       | 5.26E-06                                                                        |
| ESO-718                             | 3.95E-06                                                            | 1.74E-06                                                             | 1.19E-06                                                             | 1.17E-06                                                               | 8.85E-06                                                                      | 6.26E-06                                                                       | 4.95E-06                                                                       | 4.12E-06                                                                        |
| ESO-721                             | 1.67E-05                                                            | 1.13E-05                                                             | 5.33E-06                                                             | 3.08E-06                                                               | 1.56E-05                                                                      | 1.36E-05                                                                       | 9.86E-06                                                                       | 9.24E-06                                                                        |
| ESO-774                             | 1.14E-05                                                            | 6.88E-06                                                             | 4.12E-06                                                             | 2.23E-06                                                               | 1.16E-05                                                                      | 8.57E-06                                                                       | 6.39E-06                                                                       | 5.37E-06                                                                        |
| ESO-838                             | 2.18E-05                                                            | 1.28E-05                                                             | 6.05E-06                                                             | 4.00E-06                                                               | 1.46E-05                                                                      | 1.15E-05                                                                       | 8.59E-06                                                                       | 7.80E-06                                                                        |
| ESO-913                             | 1.20E-05                                                            | 5.48E-06                                                             | 3.50E-06                                                             | 2.50E-06                                                               | 8.93E-06                                                                      | 6.45E-06                                                                       | 5.94E-06                                                                       | 4.94E-06                                                                        |
| Median across<br>all EAC<br>samples | 1.28E-05                                                            | 7.27E-06                                                             | 4.09E-06                                                             | 2.32E-06                                                               | 1.14E-05                                                                      | 8.60E-06                                                                       | 6.92E-06                                                                       | 5.53E-06                                                                        |

**Supplementary Table 11. Mutation strand bias comparing AA>C and all other mutations**

Table is sorted in descending order by EAC sample name

**Mutation rates (mutations per bases covered) binned by mutation type and strand**

|                                      | AA>C                   |                    | All Other Mutations    |                    |
|--------------------------------------|------------------------|--------------------|------------------------|--------------------|
|                                      | Non-transcribed Strand | Transcribed Strand | Non-transcribed Strand | Transcribed Strand |
| <b>ESO-0327</b>                      | 3.64E-05               | 3.31E-05           | 1.31E-05               | 1.28E-05           |
| <b>ESO-0582</b>                      | 9.92E-06               | 8.75E-06           | 7.94E-06               | 8.00E-06           |
| <b>ESO-0601</b>                      | 1.75E-06               | 1.87E-06           | 9.33E-06               | 9.41E-06           |
| <b>ESO-0837</b>                      | 5.75E-06               | 5.98E-06           | 8.59E-06               | 8.56E-06           |
| <b>ESO-0874</b>                      | 5.95E-06               | 5.40E-06           | 6.12E-06               | 6.14E-06           |
| <b>ESO-1060</b>                      | 9.06E-06               | 8.39E-06           | 1.07E-05               | 1.06E-05           |
| <b>ESO-1145</b>                      | 4.09E-05               | 3.73E-05           | 1.68E-05               | 1.66E-05           |
| <b>ESO-1163</b>                      | 2.30E-05               | 1.97E-05           | 1.20E-05               | 1.21E-05           |
| <b>ESO-130</b>                       | 5.01E-06               | 4.95E-06           | 7.69E-06               | 7.63E-06           |
| <b>ESO-409</b>                       | 7.17E-06               | 7.24E-06           | 7.40E-06               | 7.31E-06           |
| <b>ESO-682</b>                       | 1.56E-05               | 1.33E-05           | 9.28E-06               | 9.35E-06           |
| <b>ESO-718</b>                       | 2.25E-06               | 2.05E-06           | 6.19E-06               | 6.29E-06           |
| <b>ESO-721</b>                       | 1.04E-05               | 8.76E-06           | 1.21E-05               | 1.23E-05           |
| <b>ESO-774</b>                       | 6.65E-06               | 6.25E-06           | 8.07E-06               | 8.08E-06           |
| <b>ESO-838</b>                       | 1.28E-05               | 1.07E-05           | 1.06E-05               | 1.07E-05           |
| <b>ESO-913</b>                       | 6.65E-06               | 5.46E-06           | 6.46E-06               | 6.56E-06           |
| <b>Median across all EAC samples</b> | <b>8.12E-06</b>        | <b>7.82E-06</b>    | <b>8.94E-06</b>        | <b>8.96E-06</b>    |

**Supplementary Table 12. Coverage and mutation data for individual samples generated by WES.**

Table is sorted in ascending order by non-silent mutation rate.

| Individual                             | Number of Silent Mutations | Number of Non-silent Mutations | Number of Bases Covered | Silent Mutation Rate per Mb | Non-silent Mutation Rate per Mb | MSI Status |
|----------------------------------------|----------------------------|--------------------------------|-------------------------|-----------------------------|---------------------------------|------------|
| Median across all non-MSI+ EAC samples | 36                         | 106                            | 29,181,146              | 1.21                        | 3.62                            |            |
| ESO-859                                | 561                        | 1547                           | 30,416,320              | 18.4                        | 50.90                           | MSI        |
| ESO-0292                               | 223                        | 691                            | 29,237,901              | 7.63                        | 23.6                            | MSI        |
| ESO-717                                | 248                        | 599                            | 30,432,219              | 8.15                        | 19.70                           | MSI        |
| ESO-081                                | 159                        | 426                            | 29,181,146              | 5.45                        | 14.60                           | MSI        |
| ESO-114                                | 100                        | 317                            | 29,229,856              | 3.42                        | 10.8                            | MSS        |
| ESO-175                                | 74                         | 302                            | 30,100,720              | 2.46                        | 10                              | MSS        |
| ESO-0013                               | 62                         | 285                            | 29,190,141              | 2.12                        | 9.76                            | MSS        |
| ESO-105                                | 82                         | 256                            | 28,070,479              | 2.92                        | 9.12                            | MSS        |
| ESO-887                                | 66                         | 274                            | 30,378,675              | 2.17                        | 9.02                            | MSS        |
| ESO-721                                | 70                         | 269                            | 32,223,940              | 2.17                        | 8.35                            | MSS        |
| ESO-0001                               | 52                         | 211                            | 29,089,996              | 1.79                        | 7.25                            | MSS        |
| ESO-1059                               | 55                         | 209                            | 28,872,149              | 1.9                         | 7.24                            | MSS        |
| ESO-0129                               | 44                         | 193                            | 29,091,022              | 1.51                        | 6.63                            | MSS        |
| ESO-122                                | 52                         | 199                            | 30,026,469              | 1.73                        | 6.63                            | MSS        |
| ESO-250                                | 53                         | 183                            | 30,238,434              | 1.75                        | 6.05                            | MSS        |
| ESO-139                                | 46                         | 173                            | 28,776,263              | 1.6                         | 6.01                            | MSS        |
| ESO-2143                               | 55                         | 176                            | 29,570,674              | 1.86                        | 5.95                            | MSS        |
| ESO-049                                | 64                         | 169                            | 28,440,320              | 2.25                        | 5.94                            | MSS        |
| ESO-085                                | 35                         | 172                            | 28,954,489              | 1.21                        | 5.94                            | MSS        |
| ESO-0280                               | 45                         | 165                            | 29,033,184              | 1.55                        | 5.68                            | MSS        |
| ESO-1145                               | 48                         | 181                            | 32,160,678              | 1.49                        | 5.63                            | MSS        |
| ESO-632                                | 35                         | 161                            | 28,657,780              | 1.22                        | 5.62                            | MSS        |
| ESO-0459                               | 52                         | 162                            | 29,450,851              | 1.77                        | 5.5                             | MSS        |
| ESO-752                                | 46                         | 166                            | 30,458,745              | 1.51                        | 5.45                            | MSS        |
| ESO-152                                | 34                         | 154                            | 28,322,571              | 1.2                         | 5.44                            | MSS        |
| ESO-191                                | 56                         | 161                            | 29,986,592              | 1.87                        | 5.37                            | MSS        |
| ESO-1163                               | 55                         | 162                            | 32,185,326              | 1.71                        | 5.03                            | MSS        |
| ESO-732                                | 47                         | 145                            | 28,816,220              | 1.63                        | 5.03                            | MSS        |
| ESO-077                                | 40                         | 139                            | 28,464,574              | 1.41                        | 4.88                            | Not tested |
| ESO-539                                | 50                         | 139                            | 28,718,223              | 1.74                        | 4.84                            | Not tested |
| ESO-0015                               | 48                         | 138                            | 28,639,588              | 1.68                        | 4.82                            | Not tested |
| ESO-1670                               | 46                         | 141                            | 29,485,158              | 1.56                        | 4.78                            | Not tested |
| ESO-0115                               | 50                         | 136                            | 28,559,059              | 1.75                        | 4.76                            | Not tested |
| ESO-1133                               | 48                         | 137                            | 28,914,943              | 1.66                        | 4.74                            | Not tested |
| ESO-007                                | 42                         | 135                            | 28,859,535              | 1.46                        | 4.68                            | Not tested |
| ESO-0950                               | 42                         | 139                            | 29,687,400              | 1.41                        | 4.68                            | Not tested |
| ESO-118                                | 36                         | 138                            | 29,740,488              | 1.21                        | 4.64                            | Not tested |
| ESO-0019                               | 33                         | 133                            | 29,062,137              | 1.14                        | 4.58                            | Not tested |
| ESO-0133                               | 45                         | 131                            | 28,640,995              | 1.57                        | 4.57                            | Not tested |
| ESO-0067                               | 49                         | 130                            | 28,928,517              | 1.69                        | 4.49                            | Not tested |
| ESO-0029                               | 44                         | 129                            | 28,851,689              | 1.53                        | 4.47                            | Not tested |
| ESO-003                                | 28                         | 130                            | 29,052,530              | 0.96                        | 4.47                            | Not tested |
| ESO-173                                | 40                         | 132                            | 29,799,728              | 1.34                        | 4.43                            | Not tested |
| ESO-327                                | 40                         | 127                            | 28,707,000              | 1.39                        | 4.42                            | Not tested |
| ESO-536                                | 35                         | 128                            | 29,068,849              | 1.2                         | 4.4                             | Not tested |
| ESO-160                                | 44                         | 127                            | 28,910,732              | 1.52                        | 4.39                            | Not tested |
| ESO-187                                | 48                         | 132                            | 30,324,881              | 1.58                        | 4.35                            | Not tested |
| ESO-161                                | 46                         | 129                            | 29,829,453              | 1.54                        | 4.32                            | Not tested |
| ESO-1096                               | 38                         | 124                            | 29,024,683              | 1.31                        | 4.27                            | Not tested |
| ESO-1427                               | 44                         | 125                            | 29,392,277              | 1.5                         | 4.25                            | Not tested |
| ESO-1608                               | 36                         | 126                            | 29,648,357              | 1.21                        | 4.25                            | Not tested |
| ESO-0023                               | 54                         | 122                            | 28,842,053              | 1.87                        | 4.23                            | Not tested |
| ESO-169                                | 37                         | 127                            | 30,065,118              | 1.23                        | 4.22                            | Not tested |
| ESO-1060                               | 29                         | 135                            | 32,249,110              | 0.9                         | 4.19                            | Not tested |
| ESO-224                                | 27                         | 119                            | 28,646,977              | 0.94                        | 4.15                            | Not tested |
| ESO-0053                               | 37                         | 117                            | 28,436,782              | 1.3                         | 4.11                            | Not tested |
| ESO-075                                | 39                         | 120                            | 29,269,289              | 1.33                        | 4.1                             | Not tested |
| ESO-0009                               | 50                         | 117                            | 28,730,034              | 1.74                        | 4.07                            | Not tested |
| ESO-157                                | 41                         | 122                            | 30,019,981              | 1.37                        | 4.06                            | Not tested |
| ESO-708                                | 39                         | 117                            | 29,015,629              | 1.34                        | 4.03                            | Not tested |
| ESO-H01                                | 55                         | 116                            | 29,098,022              | 1.89                        | 3.99                            | Not tested |
| ESO-K08                                | 29                         | 114                            | 28,724,346              | 1.01                        | 3.97                            | Not tested |
| ESO-143                                | 41                         | 105                            | 26,531,638              | 1.55                        | 3.96                            | Not tested |
| ESO-120                                | 40                         | 122                            | 30,934,434              | 1.29                        | 3.94                            | Not tested |
| ESO-838                                | 37                         | 127                            | 32,314,481              | 1.14                        | 3.93                            | Not tested |
| ESO-2536                               | 37                         | 114                            | 29,431,317              | 1.26                        | 3.87                            | Not tested |
| ESO-0590                               | 47                         | 113                            | 29,238,051              | 1.61                        | 3.86                            | Not tested |
| ESO-0025                               | 32                         | 110                            | 28,837,501              | 1.11                        | 3.81                            | Not tested |
| ESO-682                                | 49                         | 122                            | 32,228,720              | 1.52                        | 3.79                            | Not tested |
| ESO-1733                               | 33                         | 109                            | 29,305,993              | 1.13                        | 3.72                            | Not tested |
| ESO-0079                               | 29                         | 108                            | 29,207,368              | 0.99                        | 3.7                             | Not tested |
| ESO-720                                | 43                         | 105                            | 28,875,001              | 1.49                        | 3.64                            | Not tested |

|          |    |     |            |      |      |            |
|----------|----|-----|------------|------|------|------------|
| ESO-153  | 39 | 108 | 29,870,147 | 1.31 | 3.62 | Not tested |
| ESO-147  | 35 | 106 | 29,952,104 | 1.17 | 3.54 | Not tested |
| ESO-1481 | 30 | 104 | 29,348,610 | 1.02 | 3.54 | Not tested |
| ESO-1488 | 35 | 104 | 29,593,720 | 1.18 | 3.51 | Not tested |
| ESO-171  | 38 | 105 | 29,951,051 | 1.27 | 3.51 | Not tested |
| ESO-601  | 32 | 107 | 30,550,561 | 1.05 | 3.5  | Not tested |
| ESO-837  | 41 | 101 | 28,932,488 | 1.42 | 3.49 | Not tested |
| ESO-043  | 35 | 100 | 28,762,448 | 1.22 | 3.48 | Not tested |
| ESO-0061 | 19 | 100 | 28,805,968 | 0.66 | 3.47 | Not tested |
| ESO-045  | 27 | 101 | 29,084,292 | 0.93 | 3.47 | Not tested |
| ESO-805  | 23 | 99  | 28,661,282 | 0.8  | 3.45 | Not tested |
| ESO-0149 | 40 | 101 | 29,341,479 | 1.36 | 3.44 | Not tested |
| ESO-164  | 35 | 97  | 28,932,564 | 1.21 | 3.35 | Not tested |
| ESO-640  | 36 | 96  | 28,853,285 | 1.25 | 3.33 | Not tested |
| ESO-866  | 27 | 96  | 29,013,096 | 0.93 | 3.31 | Not tested |
| ESO-0071 | 25 | 94  | 28,544,425 | 0.88 | 3.29 | Not tested |
| ESO-141  | 40 | 97  | 29,568,169 | 1.35 | 3.28 | Not tested |
| ESO-1872 | 36 | 97  | 30,075,238 | 1.2  | 3.23 | Not tested |
| ESO-117  | 26 | 92  | 28,644,724 | 0.91 | 3.21 | Not tested |
| ESO-116  | 32 | 93  | 29,034,121 | 1.1  | 3.2  | Not tested |
| ESO-111  | 19 | 92  | 28,995,825 | 0.66 | 3.17 | Not tested |
| ESO-021  | 36 | 89  | 28,169,577 | 1.28 | 3.16 | Not tested |
| ESO-083  | 25 | 89  | 28,281,863 | 0.88 | 3.15 | Not tested |
| ESO-512  | 35 | 93  | 30,321,715 | 1.15 | 3.07 | Not tested |
| ESO-1594 | 24 | 91  | 29,779,442 | 0.81 | 3.06 | Not tested |
| ESO-107  | 21 | 89  | 29,365,873 | 0.72 | 3.03 | Not tested |
| ESO-0125 | 34 | 87  | 29,108,707 | 1.17 | 2.99 | Not tested |
| ESO-037  | 23 | 87  | 29,054,025 | 0.79 | 2.99 | Not tested |
| ESO-874  | 26 | 85  | 28,471,136 | 0.91 | 2.99 | Not tested |
| ESO-582  | 30 | 86  | 28,822,389 | 1.04 | 2.98 | Not tested |
| ESO-669  | 35 | 86  | 28,869,301 | 1.21 | 2.98 | Not tested |
| ESO-0103 | 42 | 86  | 28,954,842 | 1.45 | 2.97 | Not tested |
| ESO-179  | 35 | 89  | 30,272,103 | 1.16 | 2.94 | Not tested |
| ESO-0059 | 32 | 85  | 29,446,242 | 1.09 | 2.89 | Not tested |
| ESO-610  | 24 | 83  | 28,671,259 | 0.84 | 2.89 | Not tested |
| ESO-913  | 33 | 91  | 31,846,688 | 1.04 | 2.86 | Not tested |
| ESO-409  | 25 | 90  | 32,127,439 | 0.78 | 2.8  | Not tested |
| ESO-963  | 16 | 80  | 28,822,030 | 0.56 | 2.78 | Not tested |
| ESO-165  | 38 | 84  | 30,328,818 | 1.25 | 2.77 | Not tested |
| ESO-555  | 34 | 79  | 28,693,623 | 1.18 | 2.75 | Not tested |
| ESO-580  | 23 | 80  | 29,047,025 | 0.79 | 2.75 | Not tested |
| ESO-130  | 28 | 86  | 32,162,052 | 0.87 | 2.67 | Not tested |
| ESO-017  | 25 | 75  | 28,230,222 | 0.89 | 2.66 | Not tested |
| ESO-718  | 26 | 85  | 32,207,725 | 0.81 | 2.64 | Not tested |
| ESO-027  | 30 | 75  | 28,988,391 | 1.03 | 2.59 | Not tested |
| ESO-137  | 38 | 76  | 29,374,433 | 1.29 | 2.59 | Not tested |
| ESO-185  | 38 | 77  | 29,858,070 | 1.27 | 2.58 | Not tested |
| ESO-683  | 16 | 74  | 28,645,413 | 0.56 | 2.58 | Not tested |
| ESO-051  | 30 | 74  | 29,035,081 | 1.03 | 2.55 | Not tested |
| ESO-1130 | 21 | 74  | 29,076,176 | 0.72 | 2.55 | Not tested |
| ESO-005  | 21 | 73  | 29,046,694 | 0.72 | 2.51 | Not tested |
| ESO-155  | 28 | 75  | 29,899,585 | 0.94 | 2.51 | Not tested |
| ESO-251  | 19 | 76  | 30,508,096 | 0.62 | 2.49 | Not tested |
| ESO-131  | 19 | 73  | 29,851,412 | 0.64 | 2.45 | Not tested |
| ESO-1748 | 23 | 70  | 29,292,060 | 0.79 | 2.39 | Not tested |
| ESO-0255 | 17 | 70  | 29,557,486 | 0.58 | 2.37 | Not tested |
| ESO-S41  | 27 | 69  | 29,213,879 | 0.92 | 2.36 | Not tested |
| ESO-H63  | 17 | 68  | 29,041,986 | 0.59 | 2.34 | Not tested |
| ESO-D76  | 29 | 66  | 28,590,218 | 1.01 | 2.31 | Not tested |
| ESO-135  | 26 | 68  | 29,545,496 | 0.88 | 2.3  | Not tested |
| ESO-177  | 37 | 69  | 29,957,069 | 1.24 | 2.3  | Not tested |
| ESO-916  | 18 | 66  | 28,780,436 | 0.63 | 2.29 | Not tested |
| ESO-408  | 31 | 65  | 28,703,759 | 1.08 | 2.26 | Not tested |
| ESO-189  | 23 | 65  | 29,985,637 | 0.77 | 2.17 | Not tested |
| ESO-2472 | 27 | 62  | 29,558,796 | 0.91 | 2.1  | Not tested |
| ESO-119  | 18 | 61  | 29,972,420 | 0.6  | 2.04 | Not tested |
| ESO-1154 | 16 | 59  | 29,009,658 | 0.55 | 2.03 | Not tested |
| ESO-0123 | 33 | 59  | 29,236,815 | 1.13 | 2.02 | Not tested |
| ESO-0167 | 14 | 59  | 29,577,207 | 0.47 | 1.99 | Not tested |
| ESO-151  | 11 | 59  | 29,912,975 | 0.37 | 1.97 | Not tested |
| ESO-184  | 19 | 53  | 28,876,057 | 0.66 | 1.84 | Not tested |
| ESO-0176 | 10 | 54  | 29,493,886 | 0.34 | 1.83 | Not tested |
| ESO-167  | 18 | 50  | 29,924,615 | 0.6  | 1.67 | Not tested |
| ESO-R61  | 9  | 47  | 28,807,957 | 0.31 | 1.63 | Not tested |
| ESO-864  | 19 | 47  | 30,524,876 | 0.62 | 1.54 | Not tested |
| ESO-931  | 22 | 38  | 28,432,200 | 0.77 | 1.34 | Not tested |
| ESO-159  | 9  | 29  | 29,990,384 | 0.3  | 0.97 | Not tested |

### Supplementary Table 13. Comparison of coding-region mutations detected by both WGS and WES

Table is sorted in descending order by percentage of mutations detected by both platforms

| Sample ID    | Total Number Mutations Detected by WES | Number of Total Mutations Detected by WES and Validated by WGS | Percentage of Total Mutations Detected by WES and Validated by WGS | Total Number of Ap*A>C Mutations Detected by WES | Number of Ap*A>C Mutations Detected by WES and Validated by WGS | Percentage of Ap*A>C Mutations Detected by WES and Validated by WGS |
|--------------|----------------------------------------|----------------------------------------------------------------|--------------------------------------------------------------------|--------------------------------------------------|-----------------------------------------------------------------|---------------------------------------------------------------------|
| <b>Total</b> | <b>2585</b>                            | <b>2200</b>                                                    | <b>85%</b>                                                         | <b>313</b>                                       | <b>294</b>                                                      | <b>94%</b>                                                          |
| ESO-838      | 179                                    | 168                                                            | 94%                                                                | 21                                               | 21                                                              | 100%                                                                |
| ESO-721      | 357                                    | 323                                                            | 91%                                                                | 23                                               | 23                                                              | 100%                                                                |
| ESO-130      | 125                                    | 112                                                            | 90%                                                                | 7                                                | 7                                                               | 100%                                                                |
| ESO-1145     | 245                                    | 217                                                            | 89%                                                                | 71                                               | 68                                                              | 96%                                                                 |
| ESO-1060     | 172                                    | 147                                                            | 86%                                                                | 16                                               | 15                                                              | 94%                                                                 |
| ESO-601      | 155                                    | 132                                                            | 85%                                                                | 4                                                | 4                                                               | 100%                                                                |
| ESO-718      | 128                                    | 107                                                            | 84%                                                                | 3                                                | 3                                                               | 100%                                                                |
| ESO-837      | 150                                    | 125                                                            | 83%                                                                | 8                                                | 6                                                               | 75%                                                                 |
| ESO-1163     | 230                                    | 190                                                            | 83%                                                                | 41                                               | 39                                                              | 95%                                                                 |
| ESO-327      | 172                                    | 142                                                            | 83%                                                                | 52                                               | 46                                                              | 89%                                                                 |
| ESO-682      | 180                                    | 147                                                            | 82%                                                                | 20                                               | 19                                                              | 95%                                                                 |
| ESO-409      | 124                                    | 100                                                            | 81%                                                                | 10                                               | 9                                                               | 90%                                                                 |
| ESO-874      | 118                                    | 95                                                             | 81%                                                                | 8                                                | 7                                                               | 88%                                                                 |
| ESO-582      | 121                                    | 97                                                             | 80%                                                                | 18                                               | 17                                                              | 94%                                                                 |
| ESO-913      | 129                                    | 98                                                             | 76%                                                                | 11                                               | 10                                                              | 91%                                                                 |

**Supplementary Table 16. Protein-coding mutations in EAC identified previously in the COSMIC Database. Mutated genes in EAC detected by WES that have greater than two mutation equivalents in the COSMIC database**

Table is sorted in descending order by number of site mutations in COSMIC.

| <b>Gene</b>   | <b>Protein Coding Change</b> | <b>Number of Site Mutations in COSMIC</b> |
|---------------|------------------------------|-------------------------------------------|
| <i>KRAS</i>   | p.G12D                       | 17389                                     |
| <i>KRAS</i>   | p.G12S                       | 17110                                     |
| <i>KRAS</i>   | p.G12S                       | 17110                                     |
| <i>TP53</i>   | p.R248Q                      | 1140                                      |
| <i>TP53</i>   | p.R248W                      | 1105                                      |
| <i>TP53</i>   | p.R273H                      | 1029                                      |
| <i>TP53</i>   | p.R249W                      | 1029                                      |
| <i>TP53</i>   | p.R273C                      | 1019                                      |
| <i>TP53</i>   | p.R175H                      | 827                                       |
| <i>PIK3CA</i> | p.E545Q                      | 763                                       |
| <i>PIK3CA</i> | p.E545K                      | 763                                       |
| <i>PIK3CA</i> | p.E545K                      | 763                                       |
| <i>TP53</i>   | p.G245C                      | 573                                       |
| <i>TP53</i>   | p.G245S                      | 573                                       |
| <i>TP53</i>   | p.G245D                      | 549                                       |
| <i>TP53</i>   | p.R282W                      | 512                                       |



|        |           |     |
|--------|-----------|-----|
| TP53   | p.R282W   | 512 |
| TP53   | p.R282W   | 512 |
| TP53   | p.R282W   | 512 |
| TP53   | p.G244D   | 494 |
| TP53   | p.G244V   | 494 |
| PIK3CA | p.E542K   | 391 |
| CTNNB1 | p.S33C    | 382 |
| CTNNB1 | p.S37F    | 379 |
| CTNNB1 | p.S37F    | 379 |
| TP53   | p.C238Y   | 299 |
| TP53   | p.C176W   | 289 |
| TP53   | p.R213*   | 262 |
| TP53   | p.C176F   | 258 |
| TP53   | p.C176F   | 258 |
| TP53   | p.M237I   | 251 |
| TP53   | p.R158H   | 245 |
| TP53   | p.P278S   | 244 |
| TP53   | p.R196*   | 241 |
| TP53   | p.R196*   | 241 |
| TP53   | p.P278R   | 227 |
| TP53   | p.S241F   | 216 |
| TP53   | p.R280K   | 216 |
| TP53   | p.H193R   | 200 |
| TP53   | p.H193R   | 200 |
| TP53   | p.C135F   | 193 |
| TP53   | p.C135F   | 193 |
| TP53   | p.C135Y   | 193 |
| TP53   | p.H193Y   | 187 |
| TP53   | p.S215R   | 183 |
| TP53   | p.C242W   | 183 |
| TP53   | p.I195F   | 178 |
| TP53   | p.V216M   | 173 |
| TP53   | p.C275*   | 168 |
| TP53   | p.P152L   | 164 |
| TP53   | p.C275F   | 150 |
| TP53   | p.K132R   | 149 |
| TP53   | p.V172D   | 147 |
| APC    | p.E1554fs | 137 |
| TP53   | p.E258A   | 135 |
| TP53   | p.L252del | 126 |
| TP53   | p.E271K   | 111 |
| TP53   | p.R306*   | 110 |
| TP53   | p.R306*   | 110 |
| TP53   | p.R306*   | 110 |

|        |               |     |
|--------|---------------|-----|
| TP53   | p.I255F       | 104 |
| TP53   | p.Y205C       | 103 |
| TP53   | p.H214R       | 99  |
| TP53   | p.H214R       | 99  |
| CDKN2A | p.R80*        | 97  |
| CDKN2A | p.R58*        | 96  |
| FBXW7  | p.R465C       | 82  |
| TP53   | p.I162N       | 80  |
| TP53   | p.F134S       | 79  |
| TP53   | p.Y126D       | 66  |
| TP53   | p.L130V       | 62  |
| TP53   | p.R342*       | 61  |
| TP53   | p.R342*       | 61  |
| TP53   | p.R342*       | 61  |
| ERBB2  | p.G776V       | 55  |
| TP53   | p.G187_splice | 47  |
| CDKN2A | p.D84N        | 34  |
| PTEN   | p.K6N         | 29  |
| APC    | p.E1461fs     | 27  |
| TP53   | p.T125_splice | 26  |
| TP53   | p.A307_splice | 22  |
| TP53   | p.P98fs       | 21  |
| PTEN   | p.G251V       | 21  |
| TP53   | p.P72fs       | 20  |
| TP53   | p.C124fs      | 20  |
| PTEN   | p.D331H       | 20  |
| CDKN2A | p.Y44fs       | 16  |
| PIK3R1 | p.T576M       | 15  |
| TP53   | p.Q100*       | 15  |
| CDKN2A | p.P75fs       | 14  |
| CDKN2A | p.E120*       | 14  |
| CDKN2A | p.A76fs       | 13  |
| TP53   | p.Q104*       | 13  |
| TP53   | p.S33_splice  | 13  |
| TP53   | p.Q104*       | 13  |
| CDKN2A | p.SYGR43del   | 12  |
| SMAD4  | p.D351H       | 12  |
| PTEN   | p.K66N        | 12  |
| CDKN2A | p.Y44fs       | 11  |
| TP53   | p.E349*       | 10  |
| CDKN2A | p.D125fs      | 9   |
| PIK3R1 | p.Y452C       | 9   |
| PIK3CA | p.E110del     | 8   |
| TP53   | p.R335fs      | 8   |
| CDKN2A | p.A21P        | 8   |
| TP53   | p.P89fs       | 7   |
| KRAS   | p.K117N       | 7   |
| TP53   | p.P34fs       | 6   |
| TP53   | p.N29fs       | 6   |
| TP53   | p.P77fs       | 6   |

|                 |                |   |
|-----------------|----------------|---|
| <i>SMAD4</i>    | p.R361C        | 6 |
| <i>SMAD4</i>    | p.G386D        | 6 |
| <i>SMAD4</i>    | p.G386D        | 6 |
| <i>SMAD4</i>    | p.G386D        | 6 |
| <i>SMAD4</i>    | p.R361C        | 6 |
| <i>FBXW7</i>    | p.R278*        | 6 |
| <i>SMAD4</i>    | p.R361G        | 6 |
| <i>CDKN2A</i>   | p.TA18del      | 5 |
| <i>RUNX1</i>    | p.G143_splice  | 5 |
| <i>SMAD4</i>    | p.E330*        | 5 |
| <i>SMAD4</i>    | p.536_538LDE>Q | 4 |
| <i>CDKN2A</i>   | p.R128fs       | 4 |
| <i>PREX2</i>    | p.S565L        | 4 |
| <i>CDKN2A</i>   | p.G23V         | 4 |
| <i>ERBB2</i>    | p.D769Y        | 3 |
| <i>ERBB2</i>    | p.D769Y        | 3 |
| <i>TP53</i>     | p.L43fs        | 2 |
| <i>FGFR2</i>    | p.C382R        | 2 |
| <i>PAX5</i>     | p.D193N        | 2 |
| <i>SMAD4</i>    | p.P356L        | 2 |
| <i>SERPINA6</i> | p.R282Q        | 2 |
| <i>RASL10B</i>  | p.V52M         | 2 |
| <i>WT1</i>      | p.V448M        | 2 |
| <i>LGR6</i>     | p.S299L        | 2 |
| <i>ARID1A</i>   | p.R1335*       | 2 |
| <i>CDH1</i>     | p.D254N        | 2 |
| <i>TNFAIP3</i>  | p.K213Q        | 2 |

**Supplemental Table 17. Statistically significant protein-coding mutations in EAC generated by WES using COSMIC territory. Significance is defined as FDR q-value < 0.1.**

Table is sorted in ascending order by FDR q-value.

| <b>Gene</b>   | <b>Number of Mutations in EAC within a Respective Gene</b> | <b>Number of Unique Mutated Sites in COSMIC</b> | <b>Number of EAC Mutations Overlapping COSMIC Sites</b> | <b>FDR q-value</b> |
|---------------|------------------------------------------------------------|-------------------------------------------------|---------------------------------------------------------|--------------------|
| <i>TP53</i>   | 107                                                        | 988                                             | 107                                                     | 0.00E+00           |
| <i>SMAD4</i>  | 12                                                         | 184                                             | 11                                                      | 7.00E-10           |
| <i>CDKN2A</i> | 19                                                         | 321                                             | 18                                                      | 7.51E-10           |
| <i>PIK3CA</i> | 8                                                          | 206                                             | 8                                                       | 3.18E-09           |
| <i>KRAS</i>   | 5                                                          | 56                                              | 5                                                       | 6.70E-07           |
| <i>OR4A16</i> | 6                                                          | 1                                               | 2                                                       | 3.00E-04           |
| <i>ANO3</i>   | 4                                                          | 3                                               | 2                                                       | 2.30E-03           |
| <i>ERBB2</i>  | 5                                                          | 50                                              | 3                                                       | 5.50E-03           |
| <i>ITGA4</i>  | 6                                                          | 7                                               | 2                                                       | 9.90E-03           |
| <i>CTNNB1</i> | 3                                                          | 108                                             | 3                                                       | 4.30E-02           |

**Supplementary Table 18. Significantly enriched gene ontology (GO) processes across mutated genes identified by WES. GO enrichment analysis was performed on 8,356 genes with at least one non-silent mutation ranked by mutation significance using the Gorilla tool.**

Table is sorted in ascending order by FDR q-value.

| GO Term    | Description                                                 | FDR q-value | Enrichment | Total Number of Genes | Total Number of Genes Associated with a GO Term | Number of Genes in the Top of Input List | Number of Genes in the Intersection |
|------------|-------------------------------------------------------------|-------------|------------|-----------------------|-------------------------------------------------|------------------------------------------|-------------------------------------|
| GO:0022610 | biological adhesion                                         | 1.56E-17    | 2.37       | 7844                  | 497                                             | 920                                      | 138                                 |
| GO:0007155 | cell adhesion                                               | 7.82E-18    | 2.37       | 7844                  | 497                                             | 920                                      | 138                                 |
| GO:0007156 | homophilic cell adhesion                                    | 8.56E-12    | 3.55       | 7844                  | 123                                             | 915                                      | 51                                  |
| GO:0016337 | cell-cell adhesion                                          | 3.22E-11    | 2.61       | 7844                  | 242                                             | 919                                      | 74                                  |
| GO:0040011 | locomotion                                                  | 6.00E-07    | 1.93       | 7844                  | 505                                             | 814                                      | 101                                 |
| GO:0007411 | axon guidance                                               | 4.85E-06    | 2.44       | 7844                  | 209                                             | 814                                      | 53                                  |
| GO:0003008 | system process                                              | 1.32E-05    | 1.87       | 7844                  | 476                                             | 819                                      | 93                                  |
| GO:0006935 | chemotaxis                                                  | 3.26E-05    | 2.17       | 7844                  | 271                                             | 814                                      | 61                                  |
| GO:0042330 | taxis                                                       | 2.90E-05    | 2.17       | 7844                  | 271                                             | 814                                      | 61                                  |
| GO:0090343 | positive regulation of cell aging                           | 5.89E-05    | 3,922.00   | 7844                  | 2                                               | 2                                        | 2                                   |
| GO:0048856 | anatomical structure development                            | 1.25E-04    | 1.67       | 7844                  | 1129                                            | 471                                      | 113                                 |
| GO:0007268 | synaptic transmission                                       | 1.42E-04    | 2.08       | 7844                  | 236                                             | 945                                      | 59                                  |
| GO:0007409 | axonogenesis                                                | 1.56E-04    | 3.78       | 7844                  | 62                                              | 737                                      | 22                                  |
| GO:0048812 | neuron projection morphogenesis                             | 1.87E-04    | 3.32       | 7844                  | 83                                              | 740                                      | 26                                  |
| GO:0006928 | cellular component movement                                 | 2.46E-04    | 2.07       | 7844                  | 432                                             | 526                                      | 60                                  |
| GO:2000108 | positive regulation of leukocyte apoptotic process          | 3.20E-04    | 1,961.00   | 7844                  | 4                                               | 2                                        | 2                                   |
| GO:0006337 | nucleosome disassembly                                      | 3.45E-04    | 230.71     | 7844                  | 6                                               | 17                                       | 3                                   |
| GO:0032986 | protein-DNA complex disassembly                             | 3.26E-04    | 230.71     | 7844                  | 6                                               | 17                                       | 3                                   |
| GO:0021955 | central nervous system neuron axonogenesis                  | 3.81E-04    | 15.67      | 7844                  | 7                                               | 429                                      | 6                                   |
| GO:0050877 | neurological system process                                 | 4.52E-04    | 1.92       | 7844                  | 318                                             | 833                                      | 65                                  |
| GO:0032502 | developmental process                                       | 5.06E-04    | 1.33       | 7844                  | 1811                                            | 838                                      | 257                                 |
| GO:0032501 | multicellular organismal process                            | 6.71E-04    | 1.47       | 7844                  | 1252                                            | 659                                      | 155                                 |
| GO:0046731 | system development                                          | 6.51E-04    | 1.89       | 7844                  | 363                                             | 767                                      | 67                                  |
| GO:0021952 | central nervous system projection neuron axonogenesis       | 6.34E-04    | 18.28      | 7844                  | 5                                               | 429                                      | 5                                   |
| GO:0016043 | cellular component organization                             | 6.91E-04    | 1.37       | 7844                  | 1484                                            | 825                                      | 214                                 |
| GO:0090399 | replicative senescence                                      | 8.02E-04    | 1,307.33   | 7844                  | 6                                               | 2                                        | 2                                   |
| GO:0071840 | cellular component organization or biogenesis               | 1.45E-03    | 1.36       | 7844                  | 1499                                            | 825                                      | 214                                 |
| GO:0048869 | cellular developmental process                              | 1.57E-03    | 1.63       | 7844                  | 874                                             | 552                                      | 100                                 |
| GO:0006936 | muscle contraction                                          | 1.70E-03    | 3.01       | 7844                  | 77                                              | 811                                      | 24                                  |
| GO:0050808 | synapse organization                                        | 1.89E-03    | 3.24       | 7844                  | 59                                              | 863                                      | 21                                  |
| GO:0090342 | regulation of cell aging                                    | 1.98E-03    | 871.56     | 7844                  | 9                                               | 2                                        | 2                                   |
| GO:0090398 | cellular senescence                                         | 1.91E-03    | 871.56     | 7844                  | 9                                               | 2                                        | 2                                   |
| GO:0030198 | extracellular matrix organization                           | 3.23E-03    | 3.05       | 7844                  | 93                                              | 635                                      | 23                                  |
| GO:0043062 | extracellular structure organization                        | 3.76E-03    | 3.02       | 7844                  | 94                                              | 635                                      | 23                                  |
| GO:0048858 | cell projection morphogenesis                               | 4.02E-03    | 2.76       | 7844                  | 100                                             | 740                                      | 26                                  |
| GO:0030199 | collagen fibril organization                                | 3.92E-03    | 5.67       | 7844                  | 20                                              | 692                                      | 10                                  |
| GO:0007600 | sensory perception                                          | 4.20E-03    | 2.11       | 7844                  | 221                                             | 707                                      | 42                                  |
| GO:0048870 | cell motility                                               | 4.10E-03    | 1.81       | 7844                  | 313                                             | 859                                      | 62                                  |
| GO:0048513 | organ development                                           | 4.16E-03    | 1.67       | 7844                  | 457                                             | 833                                      | 81                                  |
| GO:0008637 | apoptotic mitochondrial changes                             | 4.56E-03    | 560.29     | 7844                  | 14                                              | 2                                        | 2                                   |
| GO:0032990 | cell part morphogenesis                                     | 4.92E-03    | 2.65       | 7844                  | 108                                             | 740                                      | 27                                  |
| GO:0032963 | collagen metabolic process                                  | 4.92E-03    | 7.06       | 7844                  | 14                                              | 635                                      | 8                                   |
| GO:2000106 | regulation of leukocyte apoptotic process                   | 6.12E-03    | 490.25     | 7844                  | 16                                              | 2                                        | 2                                   |
| GO:0032989 | cellular component morphogenesis                            | 8.71E-03    | 2.16       | 7844                  | 177                                             | 740                                      | 36                                  |
| GO:0023052 | signaling                                                   | 1.03E-02    | 1.66       | 7844                  | 355                                             | 969                                      | 73                                  |
| GO:0030155 | regulation of cell adhesion                                 | 1.14E-02    | 2.16       | 7844                  | 135                                             | 967                                      | 36                                  |
| GO:0007569 | cell aging                                                  | 1.14E-02    | 356.55     | 7844                  | 22                                              | 2                                        | 2                                   |
| GO:0034728 | nucleosome organization                                     | 1.16E-02    | 31.72      | 7844                  | 43                                              | 23                                       | 4                                   |
| GO:0030308 | negative regulation of cell growth                          | 1.24E-02    | 70.24      | 7844                  | 67                                              | 5                                        | 3                                   |
| GO:0042391 | regulation of membrane potential                            | 1.24E-02    | 2.71       | 7844                  | 64                                              | 995                                      | 22                                  |
| GO:0040008 | regulation of growth                                        | 1.35E-02    | 23.04      | 7844                  | 227                                             | 6                                        | 4                                   |
| GO:0071158 | positive regulation of cell cycle arrest                    | 1.38E-02    | 313.76     | 7844                  | 25                                              | 2                                        | 2                                   |
| GO:0071824 | protein-DNA complex subunit organization                    | 1.37E-02    | 29.66      | 7844                  | 46                                              | 23                                       | 4                                   |
| GO:0009605 | response to external stimulus                               | 1.43E-02    | 1.59       | 7844                  | 509                                             | 814                                      | 84                                  |
| GO:0030030 | cell projection organization                                | 1.54E-02    | 1.91       | 7844                  | 224                                             | 825                                      | 45                                  |
| GO:0051276 | chromosome organization                                     | 1.59E-02    | 7          | 7844                  | 289                                             | 31                                       | 8                                   |
| GO:0035507 | regulation of myosin-light-chain-phosphatase activity       | 1.65E-02    | 137.61     | 7844                  | 2                                               | 57                                       | 2                                   |
| GO:0055082 | cellular chemical homeostasis                               | 1.68E-02    | 1.81       | 7844                  | 218                                             | 995                                      | 50                                  |
| GO:0003012 | muscle system process                                       | 1.66E-02    | 2.58       | 7844                  | 90                                              | 811                                      | 24                                  |
| GO:0097105 | presynaptic membrane assembly                               | 1.84E-02    | 7.3        | 7844                  | 8                                               | 806                                      | 6                                   |
| GO:0034623 | cellular macromolecular complex disassembly                 | 1.84E-02    | 57.68      | 7844                  | 24                                              | 17                                       | 3                                   |
| GO:0032984 | macromolecular complex disassembly                          | 1.81E-02    | 57.68      | 7844                  | 24                                              | 17                                       | 3                                   |
| GO:0006873 | cellular ion homeostasis                                    | 1.83E-02    | 1.84       | 7844                  | 201                                             | 995                                      | 47                                  |
| GO:0002309 | T cell proliferation involved in immune response            | 1.81E-02    | 7,844.00   | 7844                  | 1                                               | 1                                        | 1                                   |
| GO:0019725 | cellular homeostasis                                        | 1.86E-02    | 1.74       | 7844                  | 254                                             | 995                                      | 56                                  |
| GO:0007610 | behavior                                                    | 1.88E-02    | 1.85       | 7844                  | 196                                             | 995                                      | 46                                  |
| GO:0044259 | multicellular organismal macromolecule metabolic process    | 1.86E-02    | 5.81       | 7844                  | 17                                              | 635                                      | 8                                   |
| GO:0042542 | response to hydrogen peroxide                               | 1.96E-02    | 10.54      | 7844                  | 31                                              | 144                                      | 6                                   |
| GO:0045926 | negative regulation of growth                               | 2.02E-02    | 54.1       | 7844                  | 87                                              | 5                                        | 3                                   |
| GO:0051899 | membrane depolarization                                     | 2.01E-02    | 3.66       | 7844                  | 33                                              | 845                                      | 13                                  |
| GO:0001508 | regulation of action potential                              | 2.16E-02    | 4.26       | 7844                  | 19                                              | 969                                      | 10                                  |
| GO:0034220 | ion transmembrane transport                                 | 2.29E-02    | 2.19       | 7844                  | 112                                             | 993                                      | 31                                  |
| GO:0007416 | synapse assembly                                            | 2.34E-02    | 3.58       | 7844                  | 33                                              | 863                                      | 13                                  |
| GO:0007154 | cell communication                                          | 2.42E-02    | 1.55       | 7844                  | 440                                             | 969                                      | 84                                  |
| GO:0000302 | response to reactive oxygen species                         | 2.39E-02    | 7.93       | 7844                  | 43                                              | 161                                      | 7                                   |
| GO:0016477 | cell migration                                              | 2.38E-02    | 1.75       | 7844                  | 283                                             | 856                                      | 54                                  |
| GO:0034621 | cellular macromolecular complex subunit organization        | 2.37E-02    | 9.37       | 7844                  | 186                                             | 27                                       | 6                                   |
| GO:0019220 | regulation of phosphate metabolic process                   | 2.39E-02    | 8.93       | 7844                  | 439                                             | 12                                       | 6                                   |
| GO:0051174 | regulation of phosphorus metabolic process                  | 2.36E-02    | 8.93       | 7844                  | 439                                             | 12                                       | 6                                   |
| GO:0009653 | anatomical structure morphogenesis                          | 2.37E-02    | 1.52       | 7844                  | 566                                             | 830                                      | 91                                  |
| GO:2000602 | regulation of interphase of mitotic cell cycle              | 2.44E-02    | 201.13     | 7844                  | 39                                              | 2                                        | 2                                   |
| GO:0006338 | chromatin remodeling                                        | 2.50E-02    | 22.49      | 7844                  | 45                                              | 31                                       | 4                                   |
| GO:2000774 | positive regulation of cellular senescence                  | 2.78E-02    | 3,922.00   | 7844                  | 1                                               | 2                                        | 1                                   |
| GO:0034393 | positive regulation of smooth muscle cell apoptotic process | 2.75E-02    | 3,922.00   | 7844                  | 1                                               | 2                                        | 1                                   |
| GO:0070828 | heterochromatin organization                                | 2.72E-02    | 3,922.00   | 7844                  | 1                                               | 2                                        | 1                                   |
| GO:0035986 | senescence-associated heterochromatin focus assembly        | 2.69E-02    | 3,922.00   | 7844                  | 1                                               | 2                                        | 1                                   |
| GO:0031507 | heterochromatin assembly                                    | 2.66E-02    | 3,922.00   | 7844                  | 1                                               | 2                                        | 1                                   |
| GO:0031401 | positive regulation of protein modification process         | 2.68E-02    | 17.15      | 7844                  | 305                                             | 6                                        | 4                                   |
| GO:0042098 | T cell proliferation                                        | 2.67E-02    | 174.31     | 7844                  | 10                                              | 9                                        | 2                                   |
| GO:0007267 | cell-cell signaling                                         | 2.69E-02    | 1.61       | 7844                  | 345                                             | 958                                      | 68                                  |
| GO:0050690 | regulation of defense response to virus by virus            | 2.66E-02    | 149.41     | 7844                  | 7                                               | 15                                       | 2                                   |
| GO:0007005 | mitochondrion organization                                  | 2.72E-02    | 182.42     | 7844                  | 43                                              | 2                                        | 2                                   |
| GO:0050923 | regulation of negative chemotaxis                           | 2.71E-02    | 10.03      | 7844                  | 4                                               | 782                                      | 4                                   |
| GO:0043666 | regulation of phosphoprotein phosphatase activity           | 2.74E-02    | 37.53      | 7844                  | 11                                              | 57                                       | 3                                   |
| GO:0097090 | presynaptic membrane organization                           | 3.05E-02    | 6.49       | 7844                  | 9                                               | 806                                      | 6                                   |

|            |                                                                         |          |          |      |      |     |    |
|------------|-------------------------------------------------------------------------|----------|----------|------|------|-----|----|
| GO:0006979 | response to oxidative stress                                            | 3.21E-02 | 4.97     | 7844 | 98   | 161 | 10 |
| GO:0042493 | response to drug                                                        | 3.18E-02 | 2.13     | 7844 | 149  | 792 | 32 |
| GO:0033088 | negative regulation of immature T cell proliferation in thymus          | 3.16E-02 | 76.16    | 7844 | 2    | 103 | 2  |
| GO:0033087 | negative regulation of immature T cell proliferation                    | 3.13E-02 | 76.16    | 7844 | 2    | 103 | 2  |
| GO:0007369 | gastrulation                                                            | 3.54E-02 | 156.88   | 7844 | 20   | 5   | 2  |
| GO:0050793 | regulation of developmental process                                     | 3.51E-02 | 1.86     | 7844 | 671  | 276 | 44 |
| GO:0032270 | positive regulation of cellular protein metabolic process               | 3.50E-02 | 15.56    | 7844 | 336  | 6   | 4  |
| GO:0050954 | sensory perception of mechanical stimulus                               | 3.48E-02 | 3.01     | 7844 | 59   | 707 | 16 |
| GO:2000772 | regulation of cellular senescence                                       | 3.56E-02 | 118.85   | 7844 | 6    | 22  | 2  |
| GO:0006811 | ion transport                                                           | 3.62E-02 | 1.56     | 7844 | 369  | 994 | 73 |
| GO:0001558 | regulation of cell growth                                               | 3.70E-02 | 6.3      | 7844 | 126  | 79  | 8  |
| GO:0051966 | regulation of synaptic transmission, glutamatergic                      | 3.66E-02 | 4.26     | 7844 | 18   | 921 | 9  |
| GO:0045893 | positive regulation of transcription, DNA-dependent                     | 3.63E-02 | 14.43    | 7844 | 435  | 5   | 4  |
| GO:0007399 | nervous system development                                              | 3.62E-02 | 2        | 7844 | 169  | 767 | 33 |
| GO:0016568 | chromatin modification                                                  | 3.63E-02 | 8.21     | 7844 | 185  | 31  | 6  |
| GO:0010661 | positive regulation of muscle cell apoptotic process                    | 3.60E-02 | 67.04    | 7844 | 2    | 117 | 2  |
| GO:0050801 | ion homeostasis                                                         | 3.95E-02 | 1.71     | 7844 | 230  | 995 | 50 |
| GO:0006941 | striated muscle contraction                                             | 4.02E-02 | 4.53     | 7844 | 24   | 650 | 9  |
| GO:0006983 | ER overload response                                                    | 4.00E-02 | 3,922.00 | 7844 | 2    | 1   | 1  |
| GO:0070230 | positive regulation of lymphocyte apoptotic process                     | 3.96E-02 | 3,922.00 | 7844 | 2    | 1   | 1  |
| GO:0070234 | positive regulation of T cell apoptotic process                         | 3.93E-02 | 3,922.00 | 7844 | 2    | 1   | 1  |
| GO:0070245 | positive regulation of thymocyte apoptotic process                      | 3.90E-02 | 3,922.00 | 7844 | 2    | 1   | 1  |
| GO:0051097 | negative regulation of helicase activity                                | 3.86E-02 | 3,922.00 | 7844 | 2    | 1   | 1  |
| GO:0090403 | oxidative stress-induced premature senescence                           | 3.83E-02 | 3,922.00 | 7844 | 2    | 1   | 1  |
| GO:0051254 | positive regulation of RNA metabolic process                            | 3.84E-02 | 13.79    | 7844 | 455  | 5   | 4  |
| GO:0042766 | nucleosome mobilization                                                 | 3.82E-02 | 1,961.00 | 7844 | 1    | 4   | 1  |
| GO:0042221 | response to chemical stimulus                                           | 4.10E-02 | 1.56     | 7844 | 1187 | 309 | 73 |
| GO:0001932 | regulation of protein phosphorylation                                   | 4.28E-02 | 14.21    | 7844 | 368  | 6   | 4  |
| GO:0051247 | positive regulation of protein metabolic process                        | 4.25E-02 | 14.21    | 7844 | 368  | 6   | 4  |
| GO:0045056 | transcytosis                                                            | 4.30E-02 | 14.8     | 7844 | 3    | 530 | 3  |
| GO:0016339 | calcium-dependent cell-cell adhesion                                    | 4.28E-02 | 3.86     | 7844 | 23   | 883 | 10 |
| GO:0010628 | positive regulation of gene expression                                  | 4.34E-02 | 13.13    | 7844 | 478  | 5   | 4  |
| GO:0090068 | positive regulation of cell cycle process                               | 4.39E-02 | 126.52   | 7844 | 62   | 2   | 2  |
| GO:0072131 | kidney mesenchyme morphogenesis                                         | 4.48E-02 | 1,568.80 | 7844 | 1    | 5   | 1  |
| GO:0072134 | nephrogenic mesenchyme morphogenesis                                    | 4.44E-02 | 1,568.80 | 7844 | 1    | 5   | 1  |
| GO:0072133 | metanephric mesenchyme morphogenesis                                    | 4.41E-02 | 1,568.80 | 7844 | 1    | 5   | 1  |
| GO:0048733 | sebaceous gland development                                             | 4.38E-02 | 1,568.80 | 7844 | 1    | 5   | 1  |
| GO:0006210 | thymine catabolic process                                               | 4.45E-02 | 49.33    | 7844 | 2    | 159 | 2  |
| GO:0006212 | uracil catabolic process                                                | 4.42E-02 | 49.33    | 7844 | 2    | 159 | 2  |
| GO:0019859 | thymine metabolic process                                               | 4.39E-02 | 49.33    | 7844 | 2    | 159 | 2  |
| GO:0019860 | uracil metabolic process                                                | 4.35E-02 | 49.33    | 7844 | 2    | 159 | 2  |
| GO:0034332 | adherens junction organization                                          | 4.43E-02 | 3.65     | 7844 | 30   | 789 | 11 |
| GO:0010769 | regulation of cell morphogenesis involved in differentiation            | 4.50E-02 | 2.31     | 7844 | 101  | 806 | 24 |
| GO:0010557 | positive regulation of macromolecule biosynthetic process               | 4.53E-02 | 12.86    | 7844 | 488  | 5   | 4  |
| GO:2000026 | regulation of multicellular organismal development                      | 4.53E-02 | 1.97     | 7844 | 508  | 274 | 35 |
| GO:0042592 | homeostatic process                                                     | 4.52E-02 | 1.5      | 7844 | 432  | 995 | 82 |
| GO:0050817 | coagulation                                                             | 4.67E-02 | 2.72     | 7844 | 226  | 230 | 18 |
| GO:0007596 | blood coagulation                                                       | 4.63E-02 | 2.72     | 7844 | 226  | 230 | 18 |
| GO:0008306 | associative learning                                                    | 4.60E-02 | 3.47     | 7844 | 25   | 995 | 11 |
| GO:0031344 | regulation of cell projection organization                              | 4.71E-02 | 2.12     | 7844 | 133  | 806 | 29 |
| GO:0042325 | regulation of phosphorylation                                           | 4.68E-02 | 13.34    | 7844 | 392  | 6   | 4  |
| GO:0048666 | neuron development                                                      | 4.66E-02 | 3.36     | 7844 | 55   | 552 | 13 |
| GO:0010604 | positive regulation of macromolecule metabolic process                  | 4.64E-02 | 8.09     | 7844 | 808  | 6   | 5  |
| GO:0071842 | cellular component organization at cellular level                       | 4.64E-02 | 2.6      | 7844 | 1206 | 45  | 18 |
| GO:2000653 | regulation of genetic imprinting                                        | 4.62E-02 | 1,307.33 | 7844 | 1    | 6   | 1  |
| GO:0044029 | hypomethylation of CpG island                                           | 4.59E-02 | 1,307.33 | 7844 | 1    | 6   | 1  |
| GO:0044028 | DNA hypomethylation                                                     | 4.56E-02 | 1,307.33 | 7844 | 1    | 6   | 1  |
| GO:0007265 | Ras protein signal transduction                                         | 4.57E-02 | 115.35   | 7844 | 68   | 2   | 2  |
| GO:0048017 | inositol lipid-mediated signaling                                       | 4.58E-02 | 7.99     | 7844 | 43   | 137 | 6  |
| GO:0048015 | phosphatidylinositol-mediated signaling                                 | 4.55E-02 | 7.99     | 7844 | 43   | 137 | 6  |
| GO:0008037 | cell recognition                                                        | 4.54E-02 | 2.92     | 7844 | 49   | 823 | 15 |
| GO:0008038 | neuron recognition                                                      | 4.51E-02 | 3.81     | 7844 | 25   | 823 | 10 |
| GO:0031325 | positive regulation of cellular metabolic process                       | 4.48E-02 | 7.95     | 7844 | 822  | 6   | 5  |
| GO:0007599 | hemostasis                                                              | 4.52E-02 | 2.69     | 7844 | 228  | 230 | 18 |
| GO:0006357 | regulation of transcription from RNA polymerase II promoter             | 4.51E-02 | 12.55    | 7844 | 500  | 5   | 4  |
| GO:0002209 | behavioral defense response                                             | 4.61E-02 | 6.73     | 7844 | 7    | 833 | 5  |
| GO:0045935 | positive regulation of nucleobase-containing compound metabolic process | 4.60E-02 | 12.3     | 7844 | 510  | 5   | 4  |
| GO:0032700 | negative regulation of interleukin-17 production                        | 4.58E-02 | 68.81    | 7844 | 4    | 57  | 2  |
| GO:0007050 | cell cycle arrest                                                       | 4.69E-02 | 108.94   | 7844 | 72   | 2   | 2  |
| GO:0071841 | cellular component organization or biogenesis at cellular level         | 4.84E-02 | 2.57     | 7844 | 1221 | 45  | 18 |
| GO:0051173 | positive regulation of nitrogen compound metabolic process              | 4.83E-02 | 12.09    | 7844 | 519  | 5   | 4  |
| GO:2000177 | regulation of neural precursor cell proliferation                       | 4.86E-02 | 4.72     | 7844 | 22   | 604 | 8  |
| GO:0060134 | prepulse inhibition                                                     | 4.87E-02 | 7.01     | 7844 | 8    | 699 | 5  |
| GO:0006996 | organelle organization                                                  | 4.89E-02 | 3.1      | 7844 | 786  | 45  | 14 |
| GO:0007612 | learning                                                                | 4.93E-02 | 2.82     | 7844 | 42   | 995 | 15 |
| GO:0007611 | learning or memory                                                      | 5.03E-02 | 2.76     | 7844 | 80   | 604 | 17 |
| GO:0033555 | multicellular organismal response to stress                             | 5.04E-02 | 5.4      | 7844 | 19   | 535 | 7  |
| GO:0048583 | regulation of response to stimulus                                      | 5.05E-02 | 4.17     | 7844 | 996  | 17  | 9  |
| GO:0034330 | cell junction organization                                              | 5.09E-02 | 2.31     | 7844 | 99   | 789 | 23 |
| GO:0046651 | lymphocyte proliferation                                                | 5.12E-02 | 96.84    | 7844 | 18   | 9   | 2  |
| GO:0007568 | aging                                                                   | 5.13E-02 | 101.87   | 7844 | 77   | 2   | 2  |
